# Supplementary material for: Visible-light-induced, catalyst and additive-free cycloaddition of vinylcyclopropanes: access to sulfur-containing seven-membered heterocycles
Source: Royal Society of Chemistry journal article supplement (doi:10.1039/d1qo01007g), 2021-01-01

# Visible-Light-Induced, Catalyst and Additive-Free Cycloaddition of Vinylcyclopropanes: Access to Sulfur- Containing Seven-Membered Heterocycles

Xiaozhou Huang,<sup>a,c</sup> Rui Wang,<sup>a,c</sup> Cen Zhou,<sup>\*b</sup> Rong Gao,<sup>a</sup> Haowen Zhang,<sup>a</sup> Ying Zheng,<sup>\*a</sup> and Xiao Zhang<sup>\*a</sup>

<sup>a</sup> Fujian Key Laboratory of Polymer Science, Fujian Provincial Key Laboratory of Advanced Materials Oriented Chemical Engineering, College of Chemistry and Materials Science, Fujian Normal University, 8 Shangsang Lu, Fuzhou 350007, China. E-mail: zyingth@sina.com; zhangxiao@fjnu.edu.cn

<sup>b</sup> Fujian Engineering and Research Center of New Chinese Lacquer Materials, Ocean College, Minjiang University, Fuzhou 350108, China. E-mail: zhouden@mju.edu.cn

<sup>c</sup> These authors contributed equally.

## Table of Contents

|                                                                                          |     |
|------------------------------------------------------------------------------------------|-----|
| 1. General methods .....                                                                 | S1  |
| 2. General Procedure for Visible-Light-Induced Cycloaddition of Vinylcyclopropanes ..... | S2  |
| 3. Mechanistic studies .....                                                             | S12 |
| 4. X-Ray crystal data .....                                                              | S15 |
| 5. References .....                                                                      | S20 |
| 6. Copies of NMR spectra .....                                                           | S21 |

## 1. General methods

Unless stated otherwise, all reactions were carried out in flame-dried glassware under a dry argon atmosphere. All solvents were purified and dried according to standard methods prior to use.

$^1\text{H}$  and  $^{13}\text{C}$  NMR spectra were recorded on a Bruker instrument (400 MHz and 100 MHz, respectively) and internally referenced to tetramethylsilane signal or residual protio solvent signals. Data for  $^1\text{H}$  NMR are recorded as follows: chemical shift ( $\delta$ , ppm), multiplicity (s = singlet, d = doublet, t = triplet, m = multiplet or unresolved, br = broad singlet, coupling constant(s) in Hz, integration). Data for  $^{13}\text{C}$  NMR are reported in terms of chemical shift ( $\delta$ , ppm). HRMS were obtained on an Exactive Plus LC-MS (ESI) mass spectrometer with the use of quadrupole analyzer. Fourier Transform Infrared spectra were recorded on a Nicolet iS50 FT-IR spectrophotometer. Melting points (M.p.) were determined in open capillaries without further correction.

Substrates **1** and **2** were synthesized according to the literature procedures.<sup>[1,2]</sup> Solvents were purchased from Aladdin, and used without further purification.

## 2. General Procedure for Visible-Light-Induced Cycloaddition of Vinylcyclopropanes

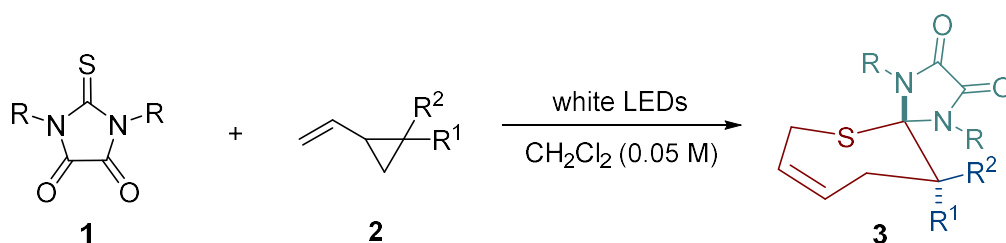

To a flame-dried sealed tube were added **1** (0.3 mmol, 1.0 equiv), **2** (0.6 mmol, 2 equiv), and CH<sub>2</sub>Cl<sub>2</sub> (6 mL). The reaction mixture was degassed via freeze-pump-thaw for 3 cycles. After the reaction mixture was thoroughly degassed, the vial was sealed and positioned approximately 2~3 cm from 50 W white LEDs. Then the reaction mixture was stirred at room temperature for the indicated time (monitored by TLC) under nitrogen atmosphere. Afterwards, the reaction mixture was concentrated by rotary evaporation. Then the residue was purified by silica gel column chromatography (PE/EtOAc = 3/1) to afford the desired products **3**. The analytical data of the products **3a-3v** are summarized below.

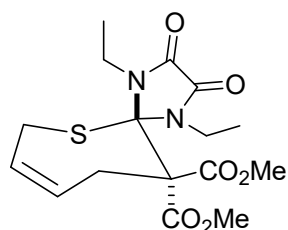

**3a**, yellow solid, 29.0 mg, 79% yield. m.p. = 125.9-127.7 °C. <sup>1</sup>H NMR (400 MHz, CDCl<sub>3</sub>) δ 5.91-5.85 (m, 1H), 5.64-5.58 (m, 1H), 4.02-3.91 (m, 4H), 3.78-3.75 (m, 2H), 3.67 (s, 6H), 3.26-3.23 (m, 2H), 1.35 (t, *J* = 7.2 Hz, 6H). <sup>13</sup>C NMR (100 MHz, CDCl<sub>3</sub>) δ 166.9, 158.7, 128.2, 126.2, 89.0, 72.8, 53.1, 41.0, 33.1, 31.5, 13.5. IR (thin film): ν<sub>max</sub> (cm<sup>-1</sup>) = 1732, 1417, 1350, 1275, 1222, 1191, 1118, 1015, 962, 920, 886, 753, 630, 562, 523. HRMS (ESI) calcd for C<sub>16</sub>H<sub>23</sub>N<sub>2</sub>O<sub>6</sub>S [M+H]<sup>+</sup>: 371.1277. Found: 371.1260.

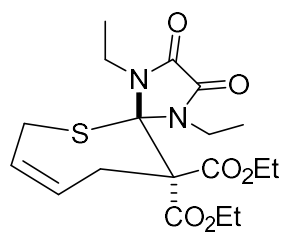

**3b**, yellow solid, 64.8 mg, 54% yield. m.p. = 102.8-106.7 °C.  $^1\text{H}$  NMR (400 MHz,  $\text{CDCl}_3$ )  $\delta$  5.90-5.84 (m, 1H), 5.64-5.58 (m, 1H), 4.18-4.06 (m, 4H), 3.97 (q,  $J = 7.2$  Hz, 4H), 3.79-3.76 (m, 2H), 3.26-3.23 (m, 2H), 1.35 (t,  $J = 7.2$  Hz, 6H), 1.21 (t,  $J = 7.2$  Hz, 6H).  $^{13}\text{C}$  NMR (100 MHz,  $\text{CDCl}_3$ )  $\delta$  166.5, 158.8, 128.3, 126.4, 89.1, 73.0, 62.5, 41.2, 33.1, 31.6, 13.7, 13.5. IR (thin film):  $\nu_{\text{max}}$  ( $\text{cm}^{-1}$ ) = 1732, 1441, 1412, 1348, 1294, 1224, 1182, 1089, 1021, 883, 858, 753, 665, 642, 579, 528. HRMS (ESI) calcd for  $\text{C}_{18}\text{H}_{27}\text{N}_2\text{O}_6\text{S}$   $[\text{M}+\text{H}]^+$ : 399.1590 . Found: 399.1576.

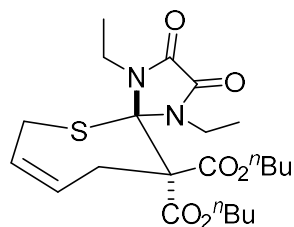

**3c**, yellow oil, 68 mg, 50% yield.  $^1\text{H}$  NMR (400 MHz,  $\text{CDCl}_3$ )  $\delta$  5.89-5.84 (m, 1H), 5.63-5.57 (m, 1H), 4.13-4.07 (m, 2H), 4.01-3.94 (m, 6H), 3.78-3.76 (m, 2H), 3.26-3.24 (m, 2H), 1.59-1.51 (m, 4H), 1.37-1.25 (m, 10H), 0.90 (t,  $J = 7.2$  Hz, 6H).  $^{13}\text{C}$  NMR (100 MHz,  $\text{CDCl}_3$ )  $\delta$  166.6, 158.8, 128.3, 126.3, 89.1, 73.1, 66.2, 41.1, 33.1, 31.6, 29.9, 18.8, 13.5, 13.4. IR (thin film):  $\nu_{\text{max}}$  ( $\text{cm}^{-1}$ ) = 2960, 1736, 1412, 1276, 1218, 1179, 1067, 932, 731, 642, 523. HRMS (ESI) calcd for  $\text{C}_{22}\text{H}_{35}\text{N}_2\text{O}_6\text{S}$   $[\text{M}+\text{H}]^+$ : 455.2216. Found: 455.2211.

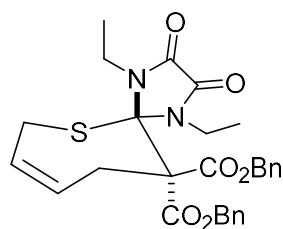

**3d**, yellow solid, 101.7 mg, 65% yield. m.p. = 142.0-144.3 °C.  $^1\text{H}$  NMR (400 MHz,  $\text{CDCl}_3$ )  $\delta$  7.31-7.25 (m, 6H), 7.16-7.14 (m, 4H), 5.79-5.73 (m, 1H), 5.46-5.40 (m, 1H), 5.13 (d,  $J = 12.0$  Hz, 2H), 4.79 (d,  $J = 12.8$  Hz, 2H), 3.94 (q,  $J = 7.2$  Hz, 4H), 3.71-3.69 (m, 2H), 3.24-3.21 (m, 2H), 1.29 (t,  $J = 6.8$  Hz, 6H).  $^{13}\text{C}$  NMR (100 MHz,  $\text{CDCl}_3$ )  $\delta$

166.2, 158.8, 134.0, 128.64, 128.59, 128.4, 128.3, 126.3, 89.1, 72.9, 68.2, 41.2, 33.1, 31.5, 13.4. IR (thin film):  $\nu_{\text{max}}$  ( $\text{cm}^{-1}$ ) = 1735, 1417, 1274, 1186, 1082, 940, 905, 865, 749, 732, 696, 649, 588, 526, 494, 422. HRMS (ESI) calcd for  $\text{C}_{28}\text{H}_{31}\text{N}_2\text{O}_6\text{S}$   $[\text{M}+\text{H}]^+$ : 523.1903. Found: 523.1891.

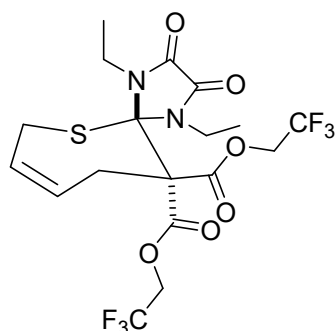

**3e**, yellow solid, 125.8 mg, 83% yield. m.p. = 121.4-123.2 °C.  $^1\text{H}$  NMR (400 MHz,  $\text{CDCl}_3$ )  $\delta$  5.94-5.88 (m, 1H), 5.66-5.60 (m, 1H), 4.73-4.64 (m, 2H), 4.26-4.17 (m, 2H), 3.98-3.92 (m, 4H), 3.79-3.76 (m, 2H), 3.34-3.32 (m, 2H), 1.36 (t,  $J$  = 6.8 Hz, 6H).  $^{13}\text{C}$  NMR (100 MHz,  $\text{CDCl}_3$ )  $\delta$  164.5, 158.5, 128.9, 125.4, 123.4, 120.7, 88.8, 73.1, 62.0, 61.6, 61.3, 60.9, 41.4, 32.8, 31.7, 13.4. IR (thin film):  $\nu_{\text{max}}$  ( $\text{cm}^{-1}$ ) = 1745, 1717, 1415, 1282, 1149, 1078, 1025, 962, 846, 756, 661, 550, 456. HRMS (ESI) calcd for  $\text{C}_{18}\text{H}_{21}\text{F}_6\text{N}_2\text{O}_6\text{S}$   $[\text{M}+\text{H}]^+$ : 507.1025. Found: 507.1008.

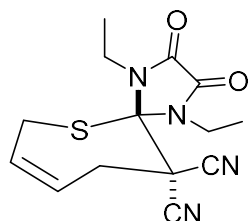

**3f**, brown solid, 39.7 mg, 43% yield. m.p. = 146.2-148.8 °C.  $^1\text{H}$  NMR (400 MHz,  $\text{CDCl}_3$ )  $\delta$  6.32-6.25 (m, 1H), 5.79-5.73 (m, 1H), 4.04-3.95 (m, 2H), 3.92-3.83 (m, 4H), 3.30-3.28 (m, 2H), 1.49 (t,  $J$  = 7.2 Hz, 6H).  $^{13}\text{C}$  NMR (100 MHz,  $\text{CDCl}_3$ )  $\delta$  157.3, 129.9, 124.8, 112.4, 86.2, 50.3, 40.3, 35.2, 28.8, 13.3. IR (thin film):  $\nu_{\text{max}}$  ( $\text{cm}^{-1}$ ) = 2919, 1744, 1411, 1351, 1297, 1196, 1079, 899, 820, 567, 519. HRMS (ESI) calcd for  $\text{C}_{14}\text{H}_{17}\text{N}_4\text{O}_2\text{S}$   $[\text{M}+\text{H}]^+$ : 305.1072. Found: 305.1060.

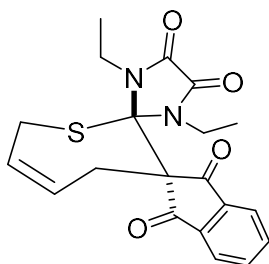

**3g**, brown solid, 22.4 mg, 20% yield. m.p. = 125.1-128.8 °C.  $^1\text{H}$  NMR (400 MHz,  $\text{CDCl}_3$ )  $\delta$  7.99-7.87 (m, 4H), 6.25-6.19 (m, 1H), 5.63-5.57 (m, 1H), 4.10-4.07 (m, 2H), 3.69-3.50 (m, 4H), 2.73-2.71 (m, 2H), 1.29 (t,  $J = 6.8$  Hz, 6H).  $^{13}\text{C}$  NMR (100 MHz,  $\text{CDCl}_3$ )  $\delta$  196.7, 157.6, 140.2, 136.9, 128.7, 127.3, 124.1, 88.5, 65.5, 40.0, 31.8, 29.1, 13.1. IR (thin film):  $\nu_{\text{max}}$  ( $\text{cm}^{-1}$ ) = 2976, 1733, 1700, 1586, 1416, 1310, 1249, 1071, 900, 791, 750, 684, 637, 609, 521. HRMS (ESI) calcd for  $\text{C}_{20}\text{H}_{21}\text{N}_2\text{O}_4\text{S}$   $[\text{M}+\text{H}]^+$ : 385.1222. Found: 385.1208.

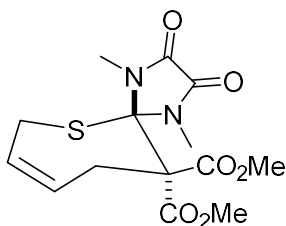

**3i**, ivory solid, 58.5 mg, 57% yield. m.p. = 185.8-188.8 °C.  $^1\text{H}$  NMR (400 MHz,  $\text{CDCl}_3$ )  $\delta$  5.84-5.79 (m, 1H), 5.65-5.59 (m, 1H), 3.82-3.80 (m, 2H), 3.66 (s, 6H), 3.43 (s, 6H), 3.29-3.26 (m, 2H).  $^{13}\text{C}$  NMR (100 MHz,  $\text{CDCl}_3$ )  $\delta$  166.7, 158.4, 128.3, 126.0, 88.9, 72.5, 53.2, 32.1, 31.7, 30.9. IR (thin film):  $\nu_{\text{max}}$  ( $\text{cm}^{-1}$ ) = 2988, 1736, 1431, 1394, 1281, 1199, 1074, 999, 966, 895, 766, 666, 644, 562, 528. HRMS (ESI) calcd for  $\text{C}_{14}\text{H}_{19}\text{N}_2\text{O}_6\text{S}$   $[\text{M}+\text{H}]^+$ : 343.0964. Found: 343.0951.

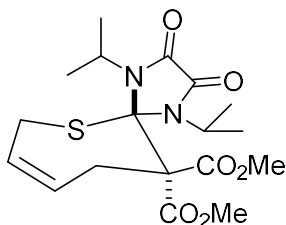

**3j**, yellow solid, 50.1 mg, 42% yield. m.p. = 133.3-134.8 °C.  $^1\text{H}$  NMR (400 MHz,  $\text{CDCl}_3$ )  $\delta$  5.96-5.90 (m, 1H), 5.63-5.57 (m, 1H), 4.65 (s, 2H), 3.87-3.50 (m, 8H), 3.20 (s, 2H), 1.55 (d,  $J = 6.8$  Hz, 6H), 1.45 (d,  $J = 6.8$  Hz, 6H).  $^{13}\text{C}$  NMR (100 MHz,  $\text{CDCl}_3$ )

$\delta$  167.1, 158.8, 128.8, 126.5, 90.2, 72.4, 53.3, 51.8, 32.6, 31.8, 20.7, 19.0. IR (thin film):  $\nu_{\text{max}}$  ( $\text{cm}^{-1}$ ) = 2988, 1732, 1423, 1340, 1274, 1219, 1132, 1058, 866, 760, 643, 561. HRMS (ESI) calcd for  $\text{C}_{18}\text{H}_{27}\text{N}_2\text{O}_6\text{S}$   $[\text{M}+\text{H}]^+$ : 399.1590. Found: 399.1576.

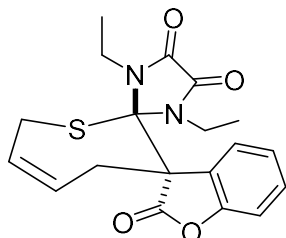

**3k**, brown solid, 62.6 mg, 56% yield. m.p. = 142.8-144.2 °C.  $^1\text{H}$  NMR (400 MHz,  $\text{CDCl}_3$ )  $\delta$  7.52-7.50 (m, 1H), 7.43-7.39 (m, 1H), 7.20-7.12 (m, 2H), 6.39-6.33 (m, 1H), 5.73-5.67 (m, 1H), 4.52-4.45 (m, 1H), 4.02-3.93 (m, 1H), 3.86-3.77 (m, 1H), 3.51-3.40 (m, 2H), 3.27-3.19 (m, 1H), 3.00-2.94 (m, 1H), 2.73-2.66 (m, 1H), 1.42 (t,  $J$  = 7.2 Hz, 3H), 1.15 (t,  $J$  = 7.2 Hz, 3H).  $^{13}\text{C}$  NMR (100 MHz,  $\text{CDCl}_3$ )  $\delta$  172.7, 158.3, 157.2, 152.3, 130.8, 129.9, 127.6, 127.0, 126.7, 124.3, 111.1, 87.6, 59.3, 39.9, 39.9, 34.1, 28.8, 13.2, 12.9. IR (thin film):  $\nu_{\text{max}}$  ( $\text{cm}^{-1}$ ) = 2988, 1797, 1736, 1461, 1412, 1285, 1231, 1131, 1072, 886, 757, 663, 603, 534, 490. HRMS (ESI) calcd for  $\text{C}_{19}\text{H}_{21}\text{N}_2\text{O}_4\text{S}$   $[\text{M}+\text{H}]^+$ : 373.1222. Found: 373.1208.

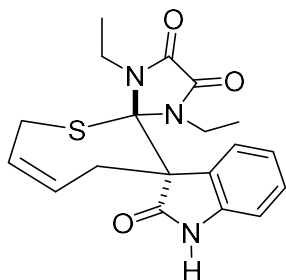

**3l**, yellow solid, 85.4 mg, 77% yield. m.p. = 168.7-169.9 °C.  $^1\text{H}$  NMR (400 MHz,  $\text{CDCl}_3$ )  $\delta$  9.19 (s, 1H), 7.68 (d,  $J$  = 8.0 Hz, 1H), 7.32-7.27 (m, 1H), 7.08 (d,  $J$  = 8.0 Hz, 1H), 7.02-6.98 (m, 1H), 6.35-6.28 (m, 1H), 5.77-5.71 (m, 1H), 4.46-4.39 (m, 1H), 4.20-4.11 (m, 1H), 3.96-3.87 (m, 1H), 3.48-3.42 (m, 1H), 3.27-3.19 (m, 1H), 3.04-2.97 (m, 1H), 2.39-2.33 (m, 1H), 2.39-2.33 (m, 1H), 1.47 (t,  $J$  = 6.8 Hz, 3H), 1.01 (t,  $J$  = 6.8 Hz, 3H).  $^{13}\text{C}$  NMR (100 MHz,  $\text{CDCl}_3$ )  $\delta$  175.8, 158.4, 157.8, 140.6, 129.7, 129.2, 128.3, 127.5, 121.7, 111.2, 87.6, 59.4, 40.3, 39.1, 33.0, 28.8, 13.2, 13.0. IR (thin film):  $\nu_{\text{max}}$  ( $\text{cm}^{-1}$ ) = 3675, 2988, 1737, 1701, 1616, 1448, 1413, 1349, 1302, 1211, 1077, 879, 758, 599, 521. HRMS (ESI) calcd for  $\text{C}_{19}\text{H}_{22}\text{N}_3\text{O}_3\text{S}$   $[\text{M}+\text{H}]^+$ : 372.1382. Found: 372.1368.

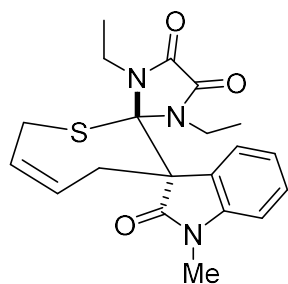

**3m**, yellow solid, 66.0 mg, 57% yield. 165.7-167.9 °C.  $^1\text{H}$  NMR (400 MHz,  $\text{CDCl}_3$ )  $\delta$  7.57-7.55 (m, 1H), 7.38-7.34 (m, 1H), 7.09-7.04 (m, 1H), 6.86-6.84 (m, 1H), 6.36-6.29 (m, 1H), 5.73-5.66 (m, 1H), 4.64-4.57 (m, 1H), 3.99-3.90 (m, 1H), 3.87-3.78 (m, 1H), 3.45-3.39 (m, 1H), 3.36-3.28 (m, 1H), 3.21-3.12 (m, 4H), 2.93-2.86 (m, 1H), 2.52-2.46 (m, 1H), 1.40 (t,  $J = 6.8$  Hz, 3H), 1.11 (t,  $J = 6.8$  Hz, 3H).  $^{13}\text{C}$  NMR (100 MHz,  $\text{CDCl}_3$ )  $\delta$  173.6, 158.4, 157.4, 142.7, 129.9, 129.3, 128.6, 128.0, 127.0, 122.4, 108.5, 87.8, 59.6, 39.8, 39.5, 33.5, 28.9, 26.4, 13.3, 13.1. IR (thin film):  $\nu_{\text{max}}$  ( $\text{cm}^{-1}$ ) = 2986, 1704, 1608, 1414, 1349, 1301, 1081, 888, 780, 746, 697, 638, 575, 541, 523, 500. HRMS (ESI) calcd for  $\text{C}_{20}\text{H}_{24}\text{N}_3\text{O}_3\text{S}$   $[\text{M}+\text{H}]^+$ : 386.1538. Found: 386.1522.

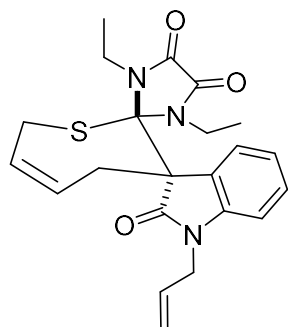

**3n**, yellow solid, 85.1 mg, 69% yield. 163.1-164.5 °C.  $^1\text{H}$  NMR (400 MHz,  $\text{CDCl}_3$ )  $\delta$  7.69-7.66 (m, 1H), 7.35-7.31 (m, 1H), 7.08-7.04 (m, 1H), 6.86 (d,  $J = 8.0$  Hz, 1H), 6.36-6.30 (m, 1H), 5.77-5.67 (m, 2H), 5.27-5.22 (m, 2H), 4.55-4.49 (m, 1H), 4.40-4.34 (m, 1H), 4.19-4.14 (m, 1H), 4.13-4.02 (m, 1H), 3.90-3.82 (m, 1H), 3.46-3.40 (m, 1H), 3.25-3.16 (m, 1H), 3.02-2.91 (m, 2H), 2.42-2.36 (m, 1H), 1.44 (t,  $J = 7.2$  Hz, 3H), 1.05 (t,  $J = 7.2$  Hz, 3H).  $^{13}\text{C}$  NMR (100 MHz,  $\text{CDCl}_3$ )  $\delta$  173.3, 158.3, 157.5, 142.1, 130.6, 129.7, 129.5, 129.0, 128.1, 127.5, 122.3, 118.9, 109.4, 87.6, 59.2, 42.6, 40.2, 39.4, 33.4, 28.9, 13.4, 13.1. IR (thin film):  $\nu_{\text{max}}$  ( $\text{cm}^{-1}$ ) = 2973, 1732, 1701, 1608, 1488, 1418, 1361, 1298, 1206, 1079, 881, 748, 633, 578, 521, 503. HRMS (ESI) calcd for  $\text{C}_{22}\text{H}_{26}\text{N}_3\text{O}_3\text{S}$   $[\text{M}+\text{H}]^+$ : 412.1695. Found: 412.1687.



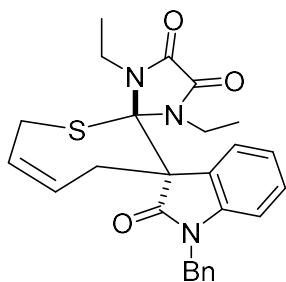

**3o**, yellow solid, 121.7 mg, 88% yield. 154.8-155.9 °C.  $^1\text{H}$  NMR (400 MHz,  $\text{CDCl}_3$ )  $\delta$  7.73-7.71 (m, 1H), 7.35-7.31 (m, 2H), 7.28-7.22 (m, 4H), 7.04-7.00 (m, 1H), 6.81-6.79 (m, 1H), 6.38-6.31 (m, 1H), 5.75-5.68 (m, 1H), 4.91 (d,  $J = 15.2$  Hz, 1H), 4.72 (d,  $J = 15.2$  Hz, 1H), 4.52-4.45 (m, 1H), 4.10-4.01 (m, 1H), 3.92-3.83 (m, 1H), 3.49-3.43 (m, 1H), 3.14-3.03 (m, 2H), 2.93-2.85 (m, 1H), 2.39-2.32 (m, 1H), 1.45 (t,  $J = 6.8$  Hz, 3H), 0.94 (t,  $J = 6.8$  Hz, 3H).  $^{13}\text{C}$  NMR (100 MHz,  $\text{CDCl}_3$ )  $\delta$  173.7, 158.4, 157.4, 141.9, 134.9, 129.6, 129.5, 128.9, 128.8, 128.0, 127.8, 127.6, 122.2, 109.4, 87.5, 58.9, 44.0, 40.2, 39.4, 33.6, 28.8, 13.1, 13.0. IR (thin film):  $\nu_{\text{max}}$  ( $\text{cm}^{-1}$ ) = 2988, 1739, 1702, 1608, 1413, 1347, 1296, 1078, 879, 749, 697, 551, 520, 457. HRMS (ESI) calcd for  $\text{C}_{26}\text{H}_{27}\text{N}_3\text{O}_3\text{SNa}$   $[\text{M}+\text{Na}]^+$ : 484.1671. Found: 484.1655.

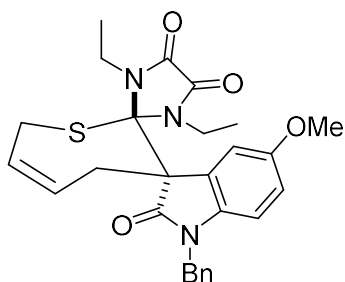

**3p**, orange solid, 53.7 mg, 36% yield. 176.7-177.7 °C.  $^1\text{H}$  NMR (400 MHz,  $\text{CDCl}_3$ )  $\delta$  7.35-7.22 (m, 6H), 6.78-6.75 (m, 1H), 6.69 (d,  $J = 8.4$  Hz, 1H), 6.37-6.30 (m, 1H), 5.76-5.69 (m, 1H), 4.87 (d,  $J = 15.2$  Hz, 1H), 4.74-4.70 (m, 1H), 4.50 (d,  $J = 16.0$  Hz, 1H), 4.06-3.98 (m, 1H), 3.89-3.80 (m, 1H), 3.75 (s, 3H), 3.46-3.40 (m, 1H), 3.19-3.14 (m, 1H), 3.07-2.95 (m, 2H), 2.40-2.33 (m, 1H), 1.43 (t,  $J = 7.2$  Hz, 3H), 1.01-0.97 (m, 3H).  $^{13}\text{C}$  NMR (100 MHz,  $\text{CDCl}_3$ )  $\delta$  173.5, 158.6, 157.5, 155.2, 135.4, 135.1, 129.6, 129.4, 128.9, 127.9, 127.7, 115.4, 113.5, 109.8, 87.6, 59.3, 55.8, 44.2, 40.2, 39.5, 33.9, 28.9, 13.2, 13.1. IR (thin film):  $\nu_{\text{max}}$  ( $\text{cm}^{-1}$ ) = 2988, 1737, 1701, 1596, 1425, 1342, 1230, 1184, 1080, 971, 873, 812, 746, 699, 613, 519, 466. HRMS (ESI) calcd for  $\text{C}_{27}\text{H}_{29}\text{N}_3\text{O}_4\text{SNa}$   $[\text{M}+\text{Na}]^+$ : 514.1776. Found: 514.1758.

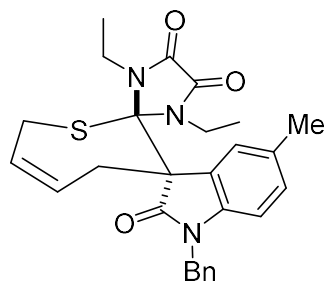

**3q**, orange solid, 94.7 mg, 66% yield. 158.8-161.6 °C.  $^1\text{H}$  NMR (400 MHz,  $\text{CDCl}_3$ )  $\delta$  7.41 (s, 1H), 7.35-7.31 (m, 2H), 7.25-7.22 (m, 3H), 7.05-7.03 (m, 1H), 6.68 (d,  $J = 8.0$  Hz, 1H), 6.36-6.30 (m, 1H), 5.74-5.67 (m, 1H), 4.86-4.74 (m, 2H), 4.56 (d,  $J = 16.0$  Hz, 1H), 3.98-3.89 (m, 1H), 3.85-3.77 (m, 1H), 3.46-3.40 (m, 1H), 3.27-3.19 (m, 1H), 3.10-2.94 (m, 2H), 2.45-2.39 (m, 1H), 2.30 (s, 3H), 1.40 (t,  $J = 6.8$  Hz, 3H), 1.02 (t,  $J = 6.8$  Hz, 3H).  $^{13}\text{C}$  NMR (100 MHz,  $\text{CDCl}_3$ )  $\delta$  173.7, 158.5, 157.5, 139.5, 135.1, 132.0, 129.9, 129.4, 128.9, 128.2, 128.0, 127.9, 127.7, 109.2, 87.7, 59.5, 44.1, 40.0, 39.6, 34.0, 28.9, 21.3, 13.2, 13.1. IR (thin film):  $\nu_{\text{max}}$  ( $\text{cm}^{-1}$ ) = 2988, 1737, 1703, 1495, 1414, 1342, 1193, 1079, 879, 819, 743, 701, 579, 554, 521, 499, 419. HRMS (ESI) calcd for  $\text{C}_{27}\text{H}_{29}\text{N}_3\text{O}_3\text{SNa}$   $[\text{M}+\text{Na}]^+$ : 498.1827. Found: 498.1812.

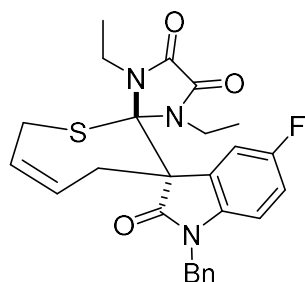

**3r**, yellow solid, 118.5 mg, 82% yield. 160.7-163.9 °C.  $^1\text{H}$  NMR (400 MHz,  $\text{CDCl}_3$ )  $\delta$  7.63-7.60 (m, 1H), 7.36-7.32 (m, 2H), 7.30-7.24 (m, 1H), 7.22-7.20 (m, 2H), 7.00-6.95 (m, 1H), 6.74-6.71 (m, 1H), 6.41-6.35 (m, 1H), 5.78-5.71 (m, 1H), 4.94 (d,  $J = 15.6$  Hz, 1H), 4.66 (d,  $J = 15.2$  Hz, 1H), 4.41-4.34 (m, 1H), 4.24-4.15 (m, 1H), 3.96-3.87 (m, 1H), 3.53-3.45 (m, 1H), 3.19-3.13 (m, 1H), 3.03-2.94 (m, 1H), 2.77-2.69 (m, 1H), 2.28-2.21 (m, 1H), 1.50 (t,  $J = 6.8$  Hz, 3H), 0.91 (t,  $J = 7.2$  Hz, 3H).  $^{13}\text{C}$  NMR (100 MHz,  $\text{CDCl}_3$ )  $\delta$  173.4, 159.3, 158.3, 157.5, 156.9, 138.1, 134.7, 130.0, 129.5, 129.4, 129.0, 128.9, 128.0, 127.6, 116.3, 116.1, 116.0, 115.9, 110.0, 110.0, 87.0, 58.7, 44.2, 40.5, 39.3, 33.2, 28.7, 13.2, 13.0. IR (thin film):  $\nu_{\text{max}}$  ( $\text{cm}^{-1}$ ) = 2988, 1737, 1703, 1489, 1414, 1341, 1271, 1177, 1075, 970, 866, 820, 750, 701, 557, 522. HRMS (ESI) calcd for  $\text{C}_{26}\text{H}_{27}\text{FN}_3\text{O}_3\text{S}$   $[\text{M}+\text{H}]^+$ : 480.1757. Found: 480.1739.

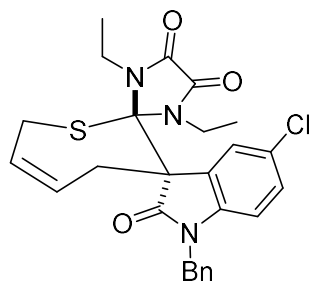

**3s**, yellow solid, 37.0 mg, 25% yield. 155.3-158.9 °C.  $^1\text{H}$  NMR (400 MHz,  $\text{CDCl}_3$ )  $\delta$  7.80 (d,  $J = 2.0$  Hz, 1H), 7.36-7.31 (m, 2H), 7.30-7.24 (m, 1H), 7.23-7.18 (m, 2H), 6.72 (d,  $J = 8.4$  Hz, 1H), 6.42-6.36 (m, 1H), 5.78-5.71 (m, 1H), 4.92 (d,  $J = 15.2$  Hz, 1H), 4.68 (d,  $J = 15.2$  Hz, 1H), 4.40-4.34 (m, 1H), 4.24-4.15 (m, 1H), 3.95-3.86 (m, 1H), 3.52-3.46 (m, 1H), 3.19-3.12 (m, 1H), 3.03-2.95 (m, 1H), 2.79-2.70 (m, 1H), 2.27-2.21 (m, 1H), 1.70 (s, 1H), 1.50 (t,  $J = 7.2$  Hz, 3H), 0.92 (t,  $J = 6.8$  Hz, 3H).  $^{13}\text{C}$  NMR (100 MHz,  $\text{CDCl}_3$ )  $\delta$  173.3, 158.3, 157.5, 140.8, 134.6, 130.2, 129.7, 129.6, 129.1, 128.9, 128.2, 128.1, 127.6, 110.5, 87.1, 58.8, 44.3, 40.6, 39.6, 33.3, 28.8, 13.3, 13.1. IR (thin film):  $\nu_{\text{max}}$  ( $\text{cm}^{-1}$ ) = 2988, 1737, 1706, 1608, 1425, 1337, 1078, 872, 822, 744, 701, 665, 550, 520, 465. HRMS (ESI) calcd for  $\text{C}_{26}\text{H}_{27}\text{ClN}_3\text{O}_3\text{S}$   $[\text{M}+\text{H}]^+$ : 496.1462. Found: 496.1446.

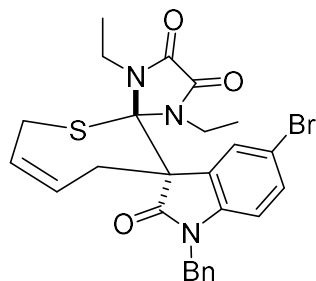

**3t**, orange solid, 47.4 mg, 29% yield. 154.5-158.4 °C.  $^1\text{H}$  NMR (400 MHz,  $\text{CDCl}_3$ )  $\delta$  7.93 (d,  $J = 2.0$  Hz, 1H), 7.40-7.32 (m, 3H), 7.20-7.18 (m, 2H), 6.67 (d,  $J = 8.4$  Hz, 1H), 6.42-6.35 (m, 1H), 5.78-5.72 (m, 1H), 4.91 (d,  $J = 15.6$  Hz, 1H), 4.67 (d,  $J = 15.6$  Hz, 1H), 4.37 (d,  $J = 18.0$  Hz, 1H), 4.24-4.15 (m, 1H), 3.95-3.86 (m, 1H), 3.53-3.46 (m, 1H), 3.18-3.12 (m, 1H), 3.03-2.95 (m, 1H), 2.80-2.71 (m, 1H), 2.27-2.21 (m, 1H), 1.70 (s, 1H), 1.50 (t,  $J = 6.8$  Hz, 3H), 0.92 (t,  $J = 6.8$  Hz, 3H).  $^{13}\text{C}$  NMR (100 MHz,  $\text{CDCl}_3$ )  $\delta$  173.2, 158.3, 157.5, 141.2, 134.5, 132.5, 130.9, 130.2, 129.1, 128.9, 128.1, 127.6, 114.9, 111.0, 87.1, 58.8, 44.2, 40.6, 39.6, 33.3, 28.7, 13.3, 13.1. IR (thin film):  $\nu_{\text{max}}$  ( $\text{cm}^{-1}$ ) = 2988, 1736, 1705, 1603, 1415, 1334, 1077, 962, 871, 803, 746, 706, 664, 557, 535, 495. HRMS (ESI) calcd for  $\text{C}_{26}\text{H}_{26}^{81}\text{BrN}_3\text{O}_3\text{SNa}$   $[\text{M}+\text{Na}]^+$ : 564.0755. Found: 564.0737.

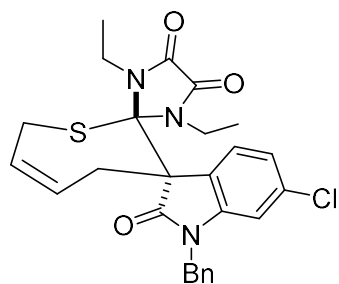

**3u**, yellow solid, 141.0 mg, 95% yield. 166.8-168.7 °C.  $^1\text{H}$  NMR (400 MHz,  $\text{CDCl}_3$ )  $\delta$  7.70 (d,  $J = 8.0$  Hz, 1H), 7.38-7.33 (m, 2H), 7.30-7.26 (m, 1H), 7.23-7.21 (m, 2H), 7.02-6.99 (m, 1H), 6.79 (d,  $J = 2.0$  Hz, 1H), 6.39-6.32 (m, 1H), 5.74-5.67 (m, 1H), 4.92 (d,  $J = 15.6$  Hz, 1H), 4.65 (d,  $J = 15.2$  Hz, 1H), 4.43-4.39 (m, 1H), 4.14-4.05 (m, 1H), 3.91-3.87 (m, 1H), 3.52-3.45 (m, 1H), 3.11-3.02 (m, 2H), 2.87-2.79 (m, 1H), 2.31-2.25 (m, 1H), 1.46 (t,  $J = 7.2$  Hz, 3H), 0.95 (t,  $J = 7.2$  Hz, 3H).  $^{13}\text{C}$  NMR (100 MHz,  $\text{CDCl}_3$ )  $\delta$  173.6, 158.2, 157.4, 143.1, 135.5, 134.3, 129.8, 129.0, 128.7, 128.6, 128.0, 127.5, 126.4, 122.1, 109.9, 87.1, 58.5, 44.1, 40.3, 39.4, 33.4, 28.7, 13.1, 12.9. IR (thin film):  $\nu_{\text{max}}$  ( $\text{cm}^{-1}$ ) = 3675, 2988, 1740, 1713, 1602, 1412, 1338, 1251, 1077, 881, 703, 561, 523, 457. HRMS (ESI) calcd for  $\text{C}_{26}\text{H}_{27}\text{ClN}_3\text{O}_3\text{S}$   $[\text{M}+\text{H}]^+$ : 496.1462. Found: 496.1443.

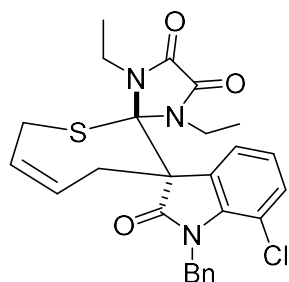

**3v**, yellow oil, 132.8 mg, 89% yield.  $^1\text{H}$  NMR (400 MHz,  $\text{CDCl}_3$ )  $\delta$  7.63 (d,  $J = 7.2$  Hz, 1H), 7.32-7.22 (m, 4H), 7.16 (d,  $J = 7.2$  Hz, 2H), 6.99 (t,  $J = 8.0$  Hz, 1H), 6.37-6.30 (m, 1H), 5.73-5.67 (m, 1H), 5.33-5.25 (m, 2H), 4.50 (d,  $J = 16.8$  Hz, 1H), 4.03-3.94 (m, 1H), 3.82-3.74 (m, 1H), 3.48-3.42 (m, 1H), 3.35-3.27 (m, 1H), 3.10-2.97 (m, 2H), 2.45-2.39 (m, 1H), 1.40 (t,  $J = 7.2$  Hz, 3H), 1.06 (t,  $J = 7.2$  Hz, 3H).  $^{13}\text{C}$  NMR (100 MHz,  $\text{CDCl}_3$ )  $\delta$  174.4, 158.4, 157.2, 138.2, 136.5, 132.3, 130.7, 129.7, 128.6, 128.4, 127.3, 126.6, 125.9, 123.0, 115.6, 87.6, 58.3, 45.1, 40.2, 39.7, 34.0, 28.9, 13.2, 13.0. IR (thin film):  $\nu_{\text{max}}$  ( $\text{cm}^{-1}$ ) = 2988, 1739, 1712, 1597, 1451, 1413, 1346, 1134, 1077, 879, 728, 702, 667, 561, 519, 459. HRMS (ESI) calcd for  $\text{C}_{26}\text{H}_{26}\text{ClN}_3\text{O}_3\text{SNa}$   $[\text{M}+\text{Na}]^+$ : 518.1281. Found: 518.1262.

### 3. Mechanistic studies

#### UV/Vis absorption spectra

UV/vis absorption spectra based on **1a** (0.01 M in CH<sub>2</sub>Cl<sub>2</sub>), **2a** (0.01 M in CH<sub>2</sub>Cl<sub>2</sub>) and the mixture of **1a** and **2a** (**1a:2a** = 1:1, 0.01 M in CH<sub>2</sub>Cl<sub>2</sub>) were recorded respectively in 1 cm path quartz cuvettes using Shimadzu UV-1750 UV/Vis spectrometer.

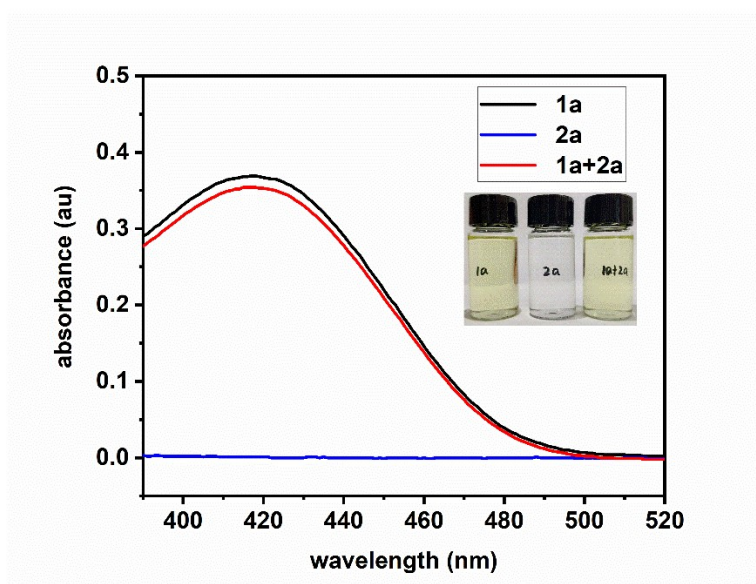

**Figure S1.** UV/vis spectra of **1a**, **2a** and the mixture of **1a** and **2a**.

#### Luminescence quenching experiments

The concentration of diethylthioparabanate **1a** was  $1 \times 10^{-2}$  M in DCM. The concentration of the quencher (**2a**, dimethyl vinylcyclopropanedicarboxylate) was 0.1 M in DCM. For each quenching experiment, the quencher was titrated to a solution (5 mL) of the diethylthioparabanate **1a** in a quartz glass bottle. The addition of the quencher refers to an increase of the quencher concentration of  $1 \times 10^{-3}$  M,  $3 \times 10^{-3}$  M,  $5 \times 10^{-3}$  M,  $8 \times 10^{-3}$  M,  $1.5 \times 10^{-2}$  M,  $2 \times 10^{-2}$  M. Then the emission intensity of diethylthioparabanate **1a** was collected respectively.

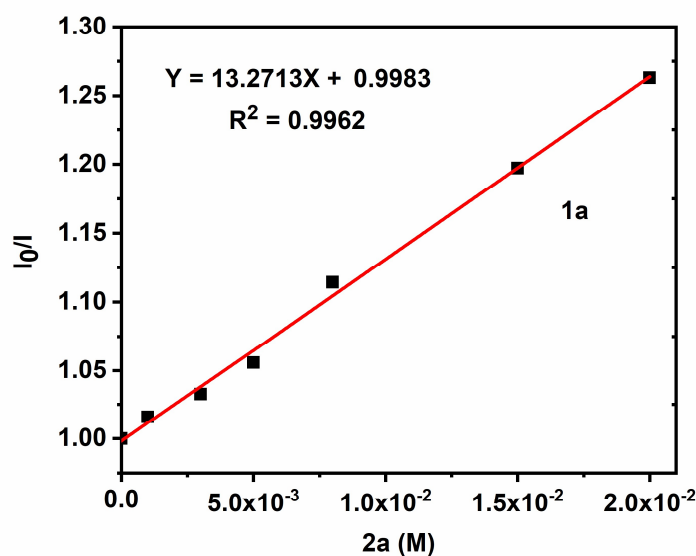

**Figure S2.** Stern-Volmer luminescence quenching experiments.

### Emission spectra of the LED lamps

The following spectra were recorded on EVERFINE Corporation HAAS-2000\_VIS\_V2 High-precision fast spectroradiometer. The forward current of the LEDs is 25 mA. Electroluminescence (EL) measurements of the LED lamps were carried out at room temperature using Everfine HAAS-2000. For the light collection, the LEDs were placed inside a 30 cm-diameter integrating sphere coupled to a high accuracy array spectroradiometer (wavelength accuracy  $<0.3$  nm) and a programmable test power LED300E.

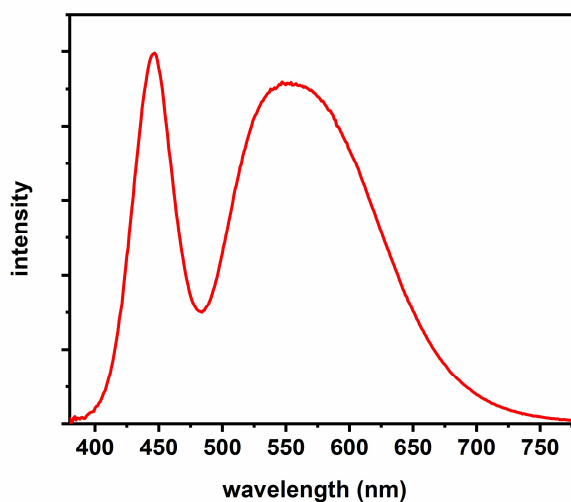

**Figure S3.** Emission spectra of the white LEDs lamp.

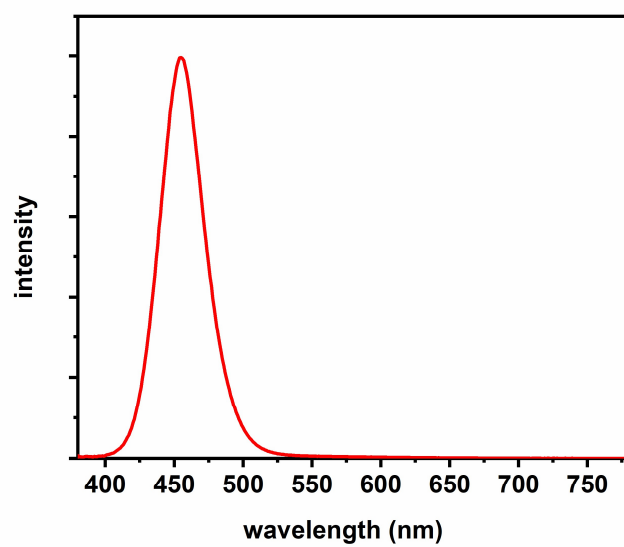

**Figure S4.** Emission spectra of the blue LEDs lamp.

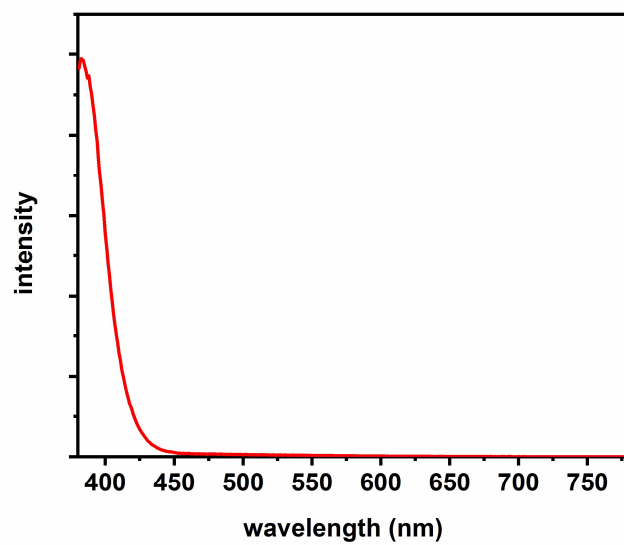

**Figure S5.** Emission spectra of the purple LEDs lamp.

#### 4. X-Ray crystal data

**Figure S6.** X-Ray crystal structure of **3a** (The crystal was obtained by slow evaporation of the solution of DCM and PE) (CCDC: 2090931):

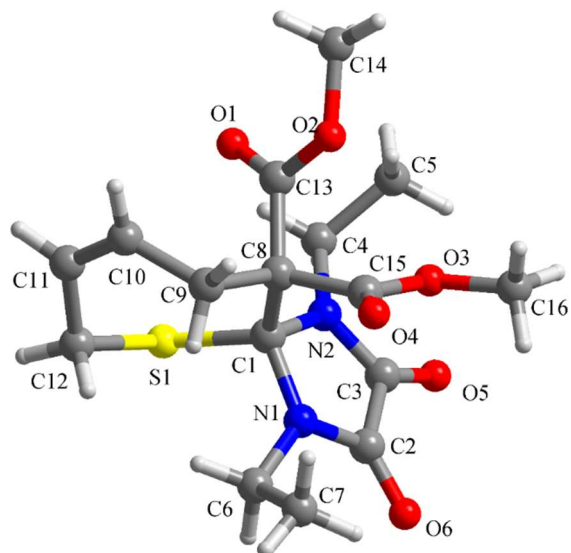

**Table 1** Crystal data and structure refinement for **1**.

|                                    |                                                                 |
|------------------------------------|-----------------------------------------------------------------|
| Identification code                | 1                                                               |
| Empirical formula                  | C <sub>16</sub> H <sub>22</sub> N <sub>2</sub> O <sub>6</sub> S |
| Formula weight                     | 370.429                                                         |
| Temperature/K                      | 162(17)                                                         |
| Crystal system                     | monoclinic                                                      |
| Space group                        | P21/c                                                           |
| a/Å                                | 11.0035(10)                                                     |
| b/Å                                | 12.9016(10)                                                     |
| c/Å                                | 12.5654(10)                                                     |
| α/°                                | 90                                                              |
| β/°                                | 101.836(8)                                                      |
| γ/°                                | 90                                                              |
| Volume/Å <sup>3</sup>              | 1745.9(3)                                                       |
| Z                                  | 4                                                               |
| ρ <sub>calc</sub> /cm <sup>3</sup> | 1.409                                                           |
| μ/mm <sup>-1</sup>                 | 0.221                                                           |
| F(000)                             | 784.9                                                           |
| Crystal size/mm <sup>3</sup>       | 0.05 × 0.05 × 0.05                                              |
| Radiation                          | Mo Kα (λ = 0.71073)                                             |
| 2θ range for data collection/°     | 7.14 to 52.04                                                   |



|                                             |                                          |
|---------------------------------------------|------------------------------------------|
| Index ranges                                | -13 ≤ h ≤ 14, -17 ≤ k ≤ 14, -17 ≤ l ≤ 17 |
| Reflections collected                       | 11808                                    |
| Independent reflections                     | 3436 [Rint = 0.0585, Rsigma = 0.0804]    |
| Data/restraints/parameters                  | 3436/0/230                               |
| Goodness-of-fit on F2                       | 1.043                                    |
| Final R indexes [I ≥ 2σ (I)]                | R1 = 0.0422, wR2 = 0.0913                |
| Final R indexes [all data]                  | R1 = 0.0617, wR2 = 0.1028                |
| Largest diff. peak/hole / e Å <sup>-3</sup> | 0.51/-0.37                               |

**Table 2 Fractional Atomic Coordinates ( $\times 10^4$ ) and Equivalent Isotropic Displacement Parameters ( $\text{\AA}^2 \times 10^3$ ) for 1.  $U_{eq}$  is defined as 1/3 of the trace of the orthogonalised  $U_{ij}$  tensor.**

| Atom | x           | y           | z          | U(eq)     |
|------|-------------|-------------|------------|-----------|
| S1   | 8663.5(5)   | 1078.6(4)   | 9656.3(4)  | 22.59(16) |
| O6   | 10019.7(14) | -1727.1(11) | 7852.8(11) | 27.0(4)   |
| O5   | 8194.0(13)  | -2384.1(11) | 9123.1(11) | 26.6(4)   |
| N1   | 9078.4(15)  | -146.6(13)  | 7959.6(12) | 18.7(4)   |
| N2   | 7664.8(15)  | -662.7(12)  | 8943.6(12) | 18.0(4)   |
| C1   | 8069.2(18)  | 273.0(15)   | 8450.2(14) | 18.3(4)   |
| C2   | 9239.6(19)  | -1177.7(16) | 8124.7(14) | 19.1(4)   |
| C4   | 6760.4(19)  | -740.9(16)  | 9661.2(14) | 22.2(5)   |
| C3   | 8306.3(19)  | -1515.7(16) | 8777.0(15) | 20.3(4)   |
| C7   | 10077(2)    | 375.6(19)   | 6426.7(16) | 31.7(5)   |
| C5   | 5583(2)     | -1293.8(17) | 9110.3(16) | 26.2(5)   |
| C6   | 10071(2)    | 454.0(17)   | 7627.2(16) | 25.8(5)   |
| C8   | 7030.3(18)  | 751.9(15)   | 7505.3(14) | 17.6(4)   |
| C12  | 8920(2)     | 2406.6(16)  | 9266.7(16) | 26.9(5)   |
| C9   | 7370(2)     | 1857.4(15)  | 7138.8(15) | 22.0(5)   |
| C10  | 7075(2)     | 2727.6(16)  | 7838.2(16) | 26.3(5)   |
| C11  | 7753(2)     | 2974.0(16)  | 8791.4(16) | 26.7(5)   |
| O3   | 6530.5(13)  | -925.3(10)  | 6754.6(9)  | 21.4(3)   |
| O4   | 6998.3(14)  | 276.3(11)   | 5623.0(10) | 26.1(4)   |
| C13  | 5756.3(19)  | 873.4(15)   | 7790.4(15) | 19.3(4)   |
| C15  | 6871.7(18)  | 22.6(16)    | 6508.3(14) | 18.4(4)   |
| O1   | 5545.1(14)  | 1145.1(11)  | 8647.4(10) | 26.3(4)   |
| O2   | 4867.7(13)  | 708.1(12)   | 6903.2(10) | 25.5(3)   |
| C16  | 6220(2)     | -1630.2(17) | 5837.8(16) | 32.1(6)   |
| C14  | 3596(2)     | 800.3(19)   | 7031.5(17) | 30.5(5)   |

**Table 3 Anisotropic Displacement Parameters ( $\text{\AA}^2 \times 10^3$ ) for 1. The Anisotropic displacement factor exponent takes the form:  $-2\pi^2[h^2a^{*2}U_{11}+2hka^*b^*U_{12}+\dots]$ .**

| Atom | U11      | U22      | U33      | U12      | U13      | U23       |
|------|----------|----------|----------|----------|----------|-----------|
| S1   | 31.0(3)  | 15.2(3)  | 18.5(3)  | 0.7(2)   | -2.1(2)  | -3.12(19) |
| O6   | 29.9(8)  | 21.8(8)  | 29.4(8)  | 6.1(7)   | 6.4(6)   | -3.1(6)   |
| O5   | 32.1(9)  | 13.2(8)  | 33.3(8)  | -0.3(7)  | 4.1(7)   | 3.0(6)    |
| N1   | 22.1(9)  | 13.4(9)  | 20.7(8)  | 1.2(8)   | 4.8(7)   | -1.2(7)   |
| N2   | 24.7(9)  | 11.1(8)  | 17.9(8)  | 0.5(8)   | 4.0(7)   | 0.7(6)    |
| C1   | 23.5(11) | 12.0(10) | 18.7(9)  | 0.7(9)   | 2.8(8)   | -0.3(8)   |
| C2   | 21.6(11) | 15.9(10) | 18.1(9)  | 0.3(9)   | 0.0(8)   | -1.2(8)   |
| C4   | 30.8(12) | 19.0(11) | 18.2(10) | 2.9(10)  | 8.3(9)   | 2.5(8)    |
| C3   | 22.5(11) | 16.1(11) | 19.2(10) | 2.6(10)  | -2.8(8)  | -1.7(8)   |
| C7   | 34.6(13) | 29.9(13) | 34.1(12) | 1.9(11)  | 15.3(10) | 6.5(10)   |
| C5   | 29.5(12) | 23.4(12) | 26.9(11) | 0.1(10)  | 8.8(9)   | 2.5(9)    |
| C6   | 23.1(11) | 21.5(12) | 33.4(11) | -2.2(10) | 7.4(9)   | 0.7(9)    |
| C8   | 24.2(11) | 12.5(10) | 15.2(9)  | -1.1(9)  | 1.8(8)   | -1.4(8)   |
| C12  | 37.3(13) | 14.7(11) | 26.0(11) | -2.1(10) | 0.4(9)   | -4.5(9)   |
| C9   | 29.0(12) | 13.9(10) | 21.1(10) | -1.8(10) | 0.7(8)   | 2.6(8)    |
| C10  | 30.2(12) | 12.8(11) | 33.3(12) | 1.7(10)  | 0.2(10)  | 2.2(9)    |
| C11  | 36.1(13) | 12.5(11) | 31.4(11) | 3.1(10)  | 6.6(10)  | -2.8(9)   |
| O3   | 33.4(8)  | 14.2(7)  | 16.1(6)  | -1.9(7)  | 3.3(6)   | -3.0(6)   |
| O4   | 39.1(9)  | 22.6(8)  | 16.9(7)  | -5.7(7)  | 6.5(6)   | -0.5(6)   |
| C13  | 23.8(11) | 11.2(10) | 22.1(10) | 2.1(9)   | 2.5(8)   | 1.8(8)    |
| C15  | 20.6(10) | 15.0(10) | 18.9(10) | 1.6(9)   | 2.4(8)   | -0.3(8)   |
| O1   | 30.7(9)  | 27.2(9)  | 21.8(7)  | 6.8(7)   | 7.1(6)   | -2.5(6)   |
| O2   | 21.9(8)  | 30.7(9)  | 22.0(7)  | 2.7(7)   | -0.1(6)  | -2.5(6)   |
| C16  | 53.0(16) | 16.8(11) | 26.3(11) | -5.4(11) | 7.4(10)  | -8.3(9)   |
| C14  | 23.3(12) | 34.0(14) | 33.3(12) | 3.9(11)  | 3.7(9)   | 1.1(10)   |

**Table 4 Bond Lengths for 1.**

| Atom | Atom | Length/ $\text{\AA}$ | Atom | Atom | Length/ $\text{\AA}$ |
|------|------|----------------------|------|------|----------------------|
| S1   | C1   | 1.8434(18)           | C7   | C6   | 1.513(3)             |
| S1   | C12  | 1.820(2)             | C8   | C9   | 1.567(3)             |
| O6   | C2   | 1.215(2)             | C8   | C13  | 1.525(3)             |
| O5   | C3   | 1.217(2)             | C8   | C15  | 1.548(3)             |
| N1   | C1   | 1.479(2)             | C12  | C11  | 1.493(3)             |
| N1   | C2   | 1.352(2)             | C9   | C10  | 1.501(3)             |
| N1   | C6   | 1.468(3)             | C10  | C11  | 1.313(3)             |

|    |    |          |     |     |          |
|----|----|----------|-----|-----|----------|
| N2 | C1 | 1.467(2) | O3  | C15 | 1.334(2) |
| N2 | C4 | 1.477(2) | O3  | C16 | 1.452(2) |
| N2 | C3 | 1.347(3) | O4  | C15 | 1.195(2) |
| C1 | C8 | 1.594(3) | C13 | O1  | 1.200(2) |
| C2 | C3 | 1.504(3) | C13 | O2  | 1.341(2) |
| C4 | C5 | 1.516(3) | O2  | C14 | 1.446(2) |

**Table 5 Bond Angles for 1.**

| Atom | Atom | Atom | Angle/°    | Atom | Atom | Atom | Angle/°    |
|------|------|------|------------|------|------|------|------------|
| C12  | S1   | C1   | 110.99(9)  | C7   | C6   | N1   | 113.81(17) |
| C2   | N1   | C1   | 112.47(16) | C9   | C8   | C1   | 113.19(16) |
| C6   | N1   | C1   | 126.27(16) | C13  | C8   | C1   | 114.72(14) |
| C6   | N1   | C2   | 118.75(17) | C13  | C8   | C9   | 105.16(16) |
| C4   | N2   | C1   | 127.94(16) | C15  | C8   | C1   | 108.17(15) |
| C3   | N2   | C1   | 113.11(16) | C15  | C8   | C9   | 108.03(14) |
| C3   | N2   | C4   | 118.64(16) | C15  | C8   | C13  | 107.23(15) |
| N1   | C1   | S1   | 112.27(13) | C11  | C12  | S1   | 113.65(16) |
| N2   | C1   | S1   | 101.75(11) | C10  | C9   | C8   | 114.55(16) |
| N2   | C1   | N1   | 101.17(15) | C11  | C10  | C9   | 124.4(2)   |
| C8   | C1   | S1   | 118.23(13) | C10  | C11  | C12  | 121.81(19) |
| C8   | C1   | N1   | 108.45(14) | C16  | O3   | C15  | 114.93(14) |
| C8   | C1   | N2   | 113.60(15) | O1   | C13  | C8   | 126.71(18) |
| N1   | C2   | O6   | 127.49(19) | O2   | C13  | C8   | 109.70(15) |
| C3   | C2   | O6   | 125.79(18) | O2   | C13  | O1   | 123.40(19) |
| C3   | C2   | N1   | 106.63(17) | O3   | C15  | C8   | 111.09(14) |
| C5   | C4   | N2   | 111.90(15) | O4   | C15  | C8   | 124.87(18) |
| N2   | C3   | O5   | 126.99(19) | O4   | C15  | O3   | 124.00(17) |
| C2   | C3   | O5   | 126.32(19) | C14  | O2   | C13  | 116.85(15) |
| C2   | C3   | N2   | 106.62(17) |      |      |      |            |

**Table 6 Hydrogen Atom Coordinates ( $\text{\AA} \times 10^4$ ) and Isotropic Displacement Parameters ( $\text{\AA}^2 \times 10^3$ ) for 1.**

| Atom | x          | y           | z           | U(eq)   |
|------|------------|-------------|-------------|---------|
| H4a  | 7135.7(19) | -1113.7(16) | 10316.7(14) | 26.6(6) |
| H4b  | 6552.4(19) | -50.1(16)   | 9871.2(14)  | 26.6(6) |
| H7a  | 9291(5)    | 604(11)     | 6011.9(16)  | 47.6(8) |

---

|      |           |            |            |         |
|------|-----------|------------|------------|---------|
| H7b  | 10727(9)  | 804(9)     | 6261(3)    | 47.6(8) |
| H7c  | 10216(14) | -331(3)    | 6246(3)    | 47.6(8) |
| H5a  | 5193(7)   | -913(6)    | 8475(6)    | 39.3(7) |
| H5b  | 5785(2)   | -1978(4)   | 8902(10)   | 39.3(7) |
| H5c  | 5026(5)   | -1340(9)   | 9605(4)    | 39.3(7) |
| H6a  | 9982(2)   | 1176.5(17) | 7810.5(16) | 30.9(6) |
| H6b  | 10865(2)  | 214.5(17)  | 8038.4(16) | 30.9(6) |
| H12a | 9353(2)   | 2779.8(16) | 9902.6(16) | 32.3(6) |
| H12b | 9453(2)   | 2398.9(16) | 8740.0(16) | 32.3(6) |
| H9a  | 8251(2)   | 1874.4(15) | 7137.9(15) | 26.3(6) |
| H9b  | 6926(2)   | 1973.8(15) | 6398.0(15) | 26.3(6) |
| H10  | 6366(2)   | 3118.2(16) | 7579.1(16) | 31.6(6) |
| H11  | 7498(2)   | 3516.9(16) | 9180.9(16) | 32.1(6) |
| H16a | 5593(10)  | -1323(5)   | 5284(5)    | 48.2(8) |
| H16b | 6949(4)   | -1765(9)   | 5550(8)    | 48.2(8) |
| H16c | 5915(13)  | -2269(5)   | 6073(3)    | 48.2(8) |
| H14a | 3045(2)   | 632(11)    | 6357(4)    | 45.8(8) |
| H14b | 3456(4)   | 332(8)     | 7587(8)    | 45.8(8) |
| H14c | 3443(4)   | 1498(3)    | 7235(11)   | 45.8(8) |

---

## 5. References

- [1] (a) J. Wang, Z. Dai, C. Xiong, J. Zhu, J. Lu, Q. Zhou, Palladium-Catalyzed Allylic Alkylation of Aldimine Esters with Vinyl-Cyclopropanes to Yield  $\alpha,\alpha$ -Disubstituted  $\alpha$ -Amino Acid Derivatives, *Adv. Synth. Catal.*, 2019, **361**, 5105-5111;  
(b) J. Xiao, X. Cheng, Y. Li, Y. He, J. Li, Z. Liu, P. Xia, W. Su, H. Yang, Palladium-catalysed ring-opening [3 + 2]-annulation of spirovinylcyclopropyl oxindole to diastereoselectively access spirooxindoles, *Org. Biomol. Chem.*, 2019, **17**, 103-107.
- [2] Ş.H. Üngören, İ. Kani, A. Günay, A facile protocol for the preparation of 5-alkylidene and 5-imino substituted hydantoins from N,N'-disubstituted parabanic acids, *Tetrahedron Lett.*, 2012, **53**, 4758-4762.

## 6. Copies of NMR spectra

### <sup>1</sup>H NMR Spectrum of **3a**

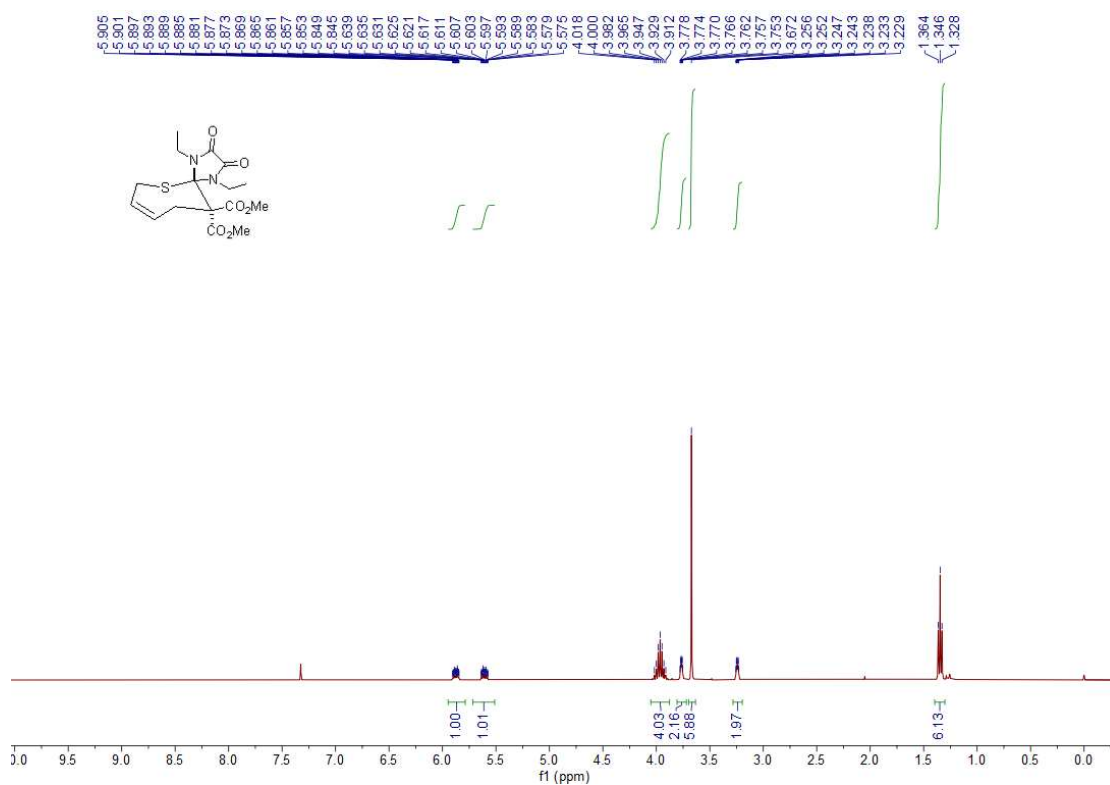

### <sup>13</sup>C NMR Spectrum of **3a**

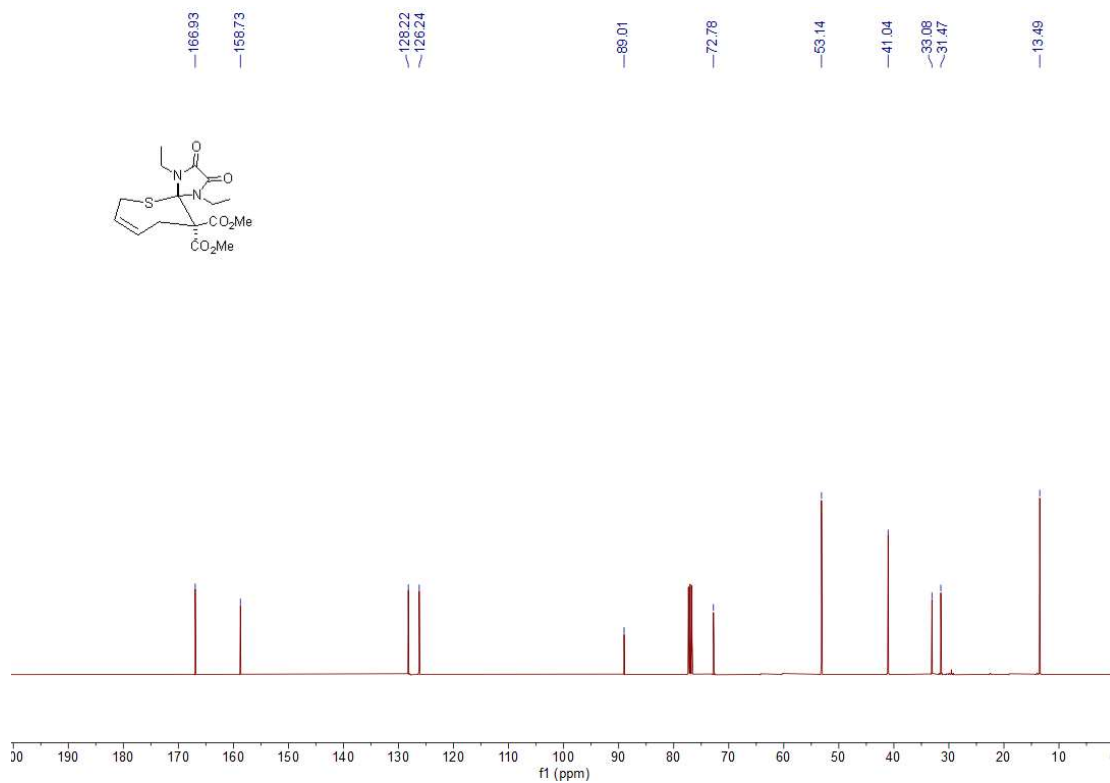

### <sup>1</sup>H NMR Spectrum of **3b**

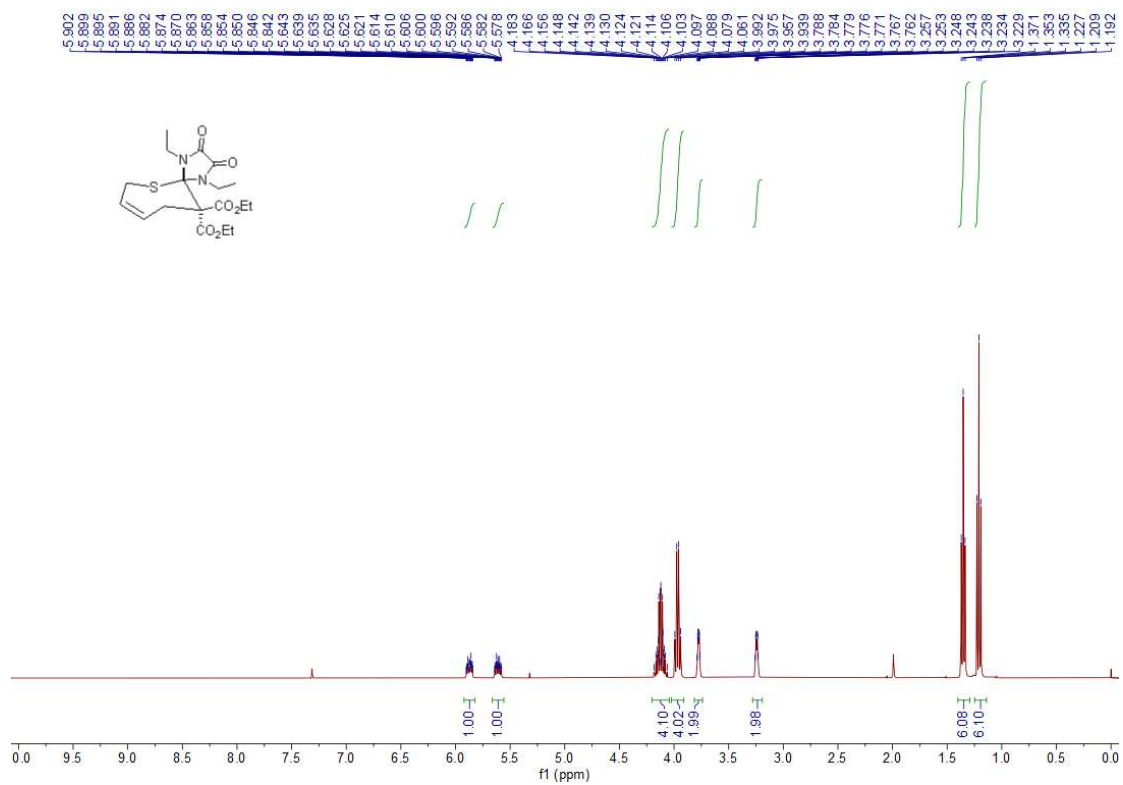

### <sup>13</sup>C NMR Spectrum of **3b**

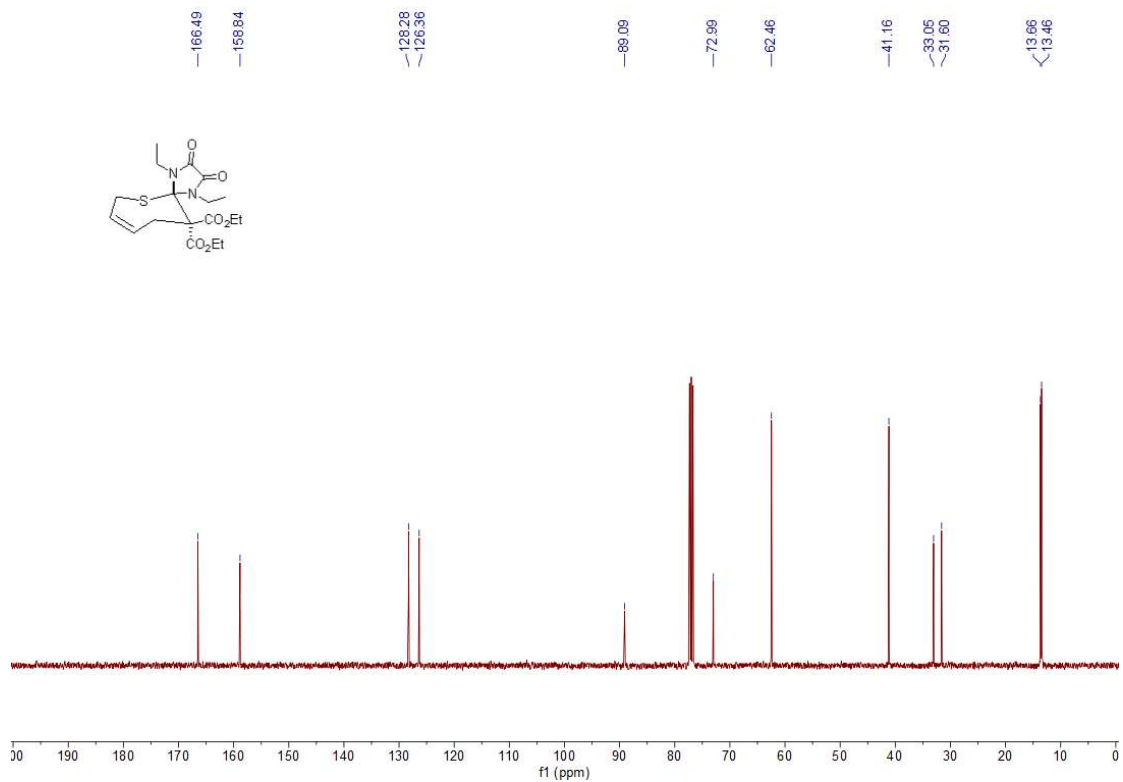

### <sup>1</sup>H NMR Spectrum of 3c

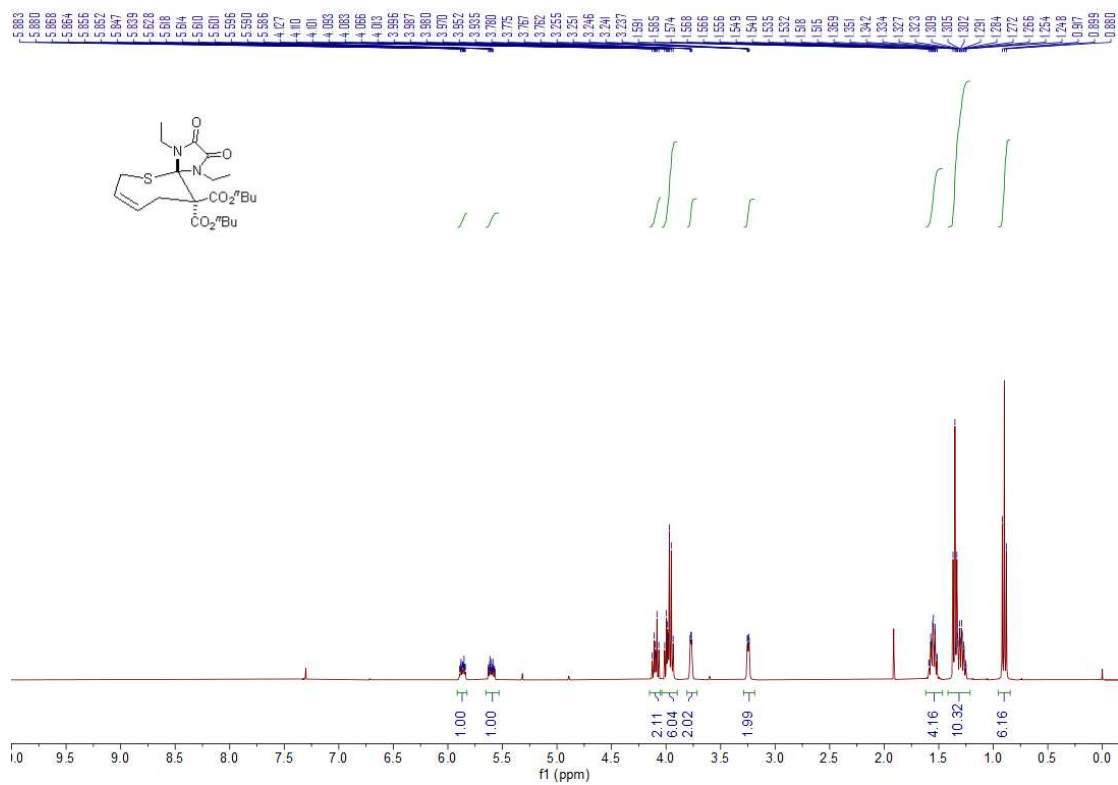

### <sup>13</sup>C NMR Spectrum of 3c

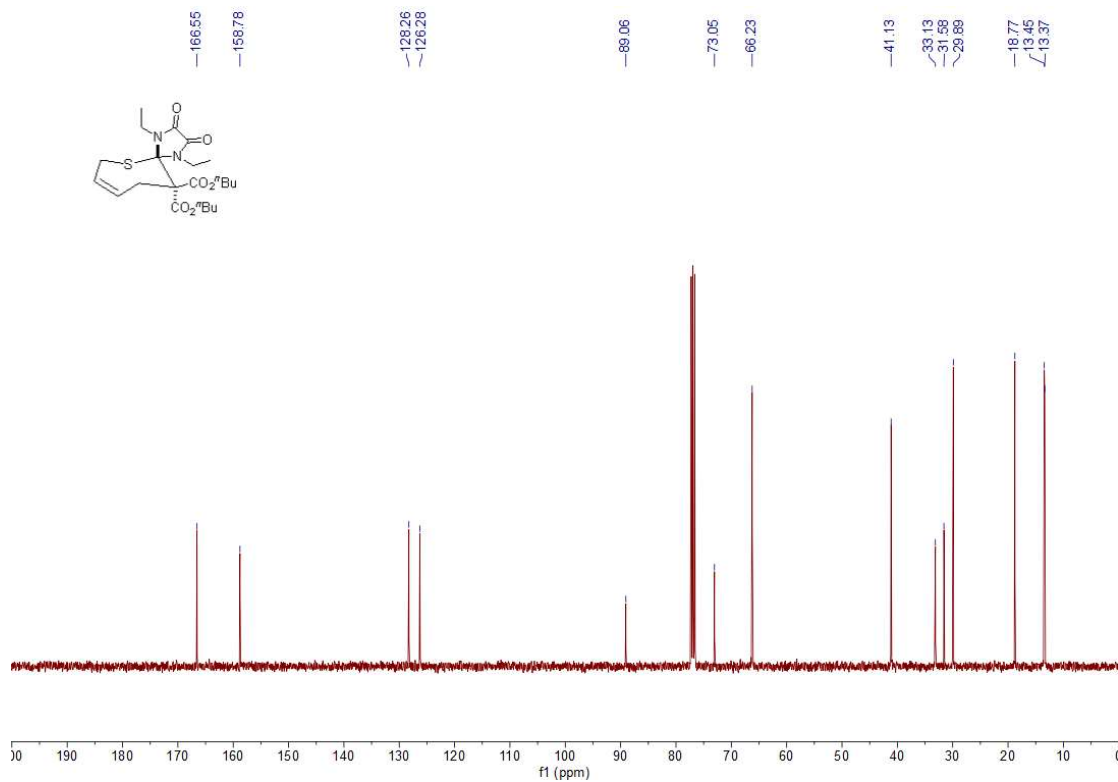



### <sup>1</sup>H NMR Spectrum of 3d

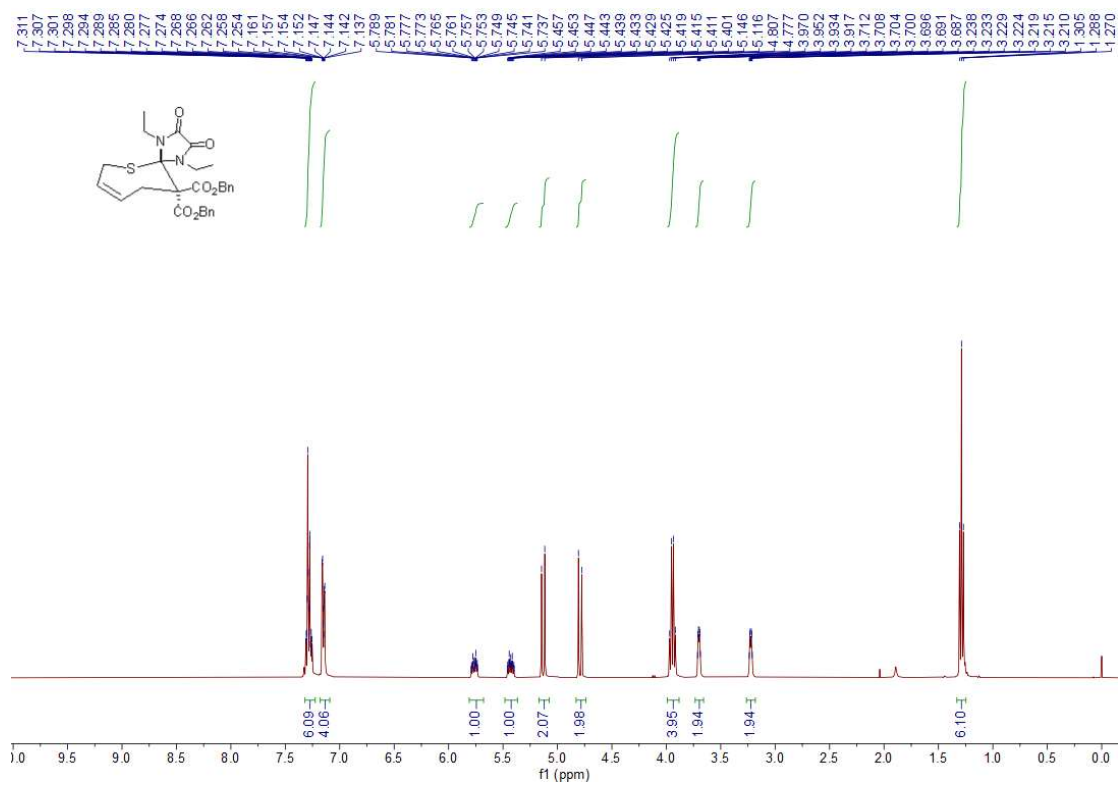

### <sup>13</sup>C NMR Spectrum of 3d

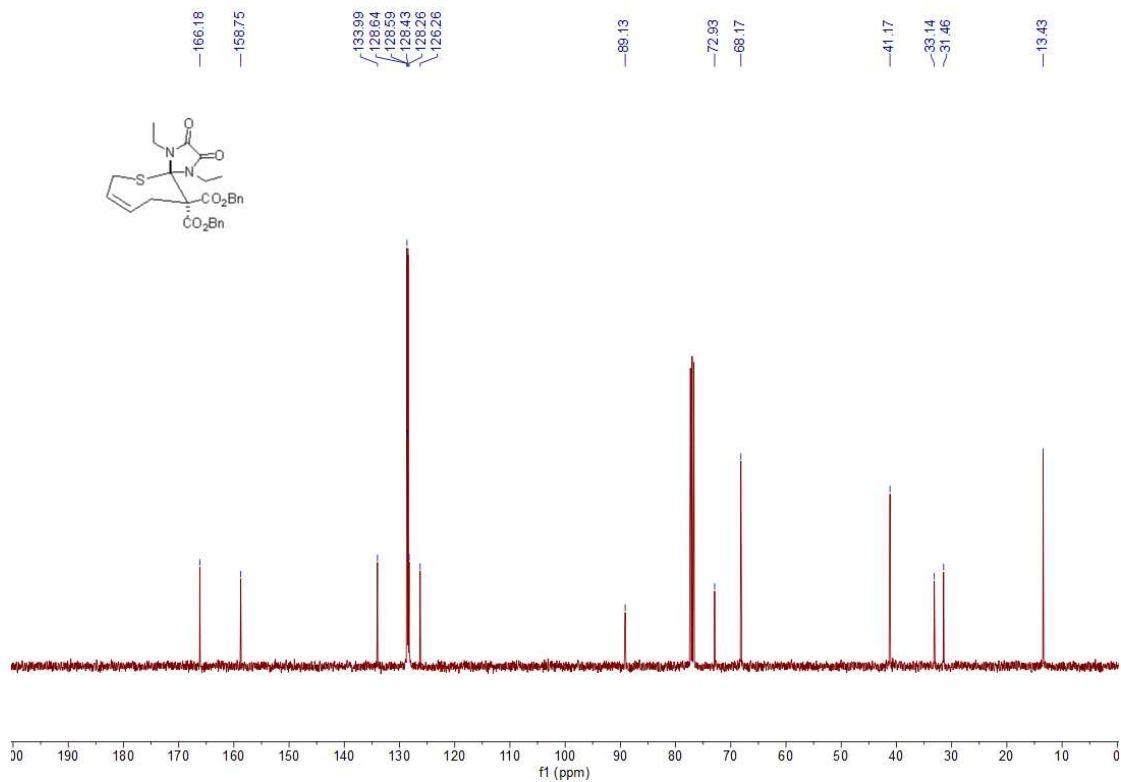

### <sup>1</sup>H NMR Spectrum of 3e

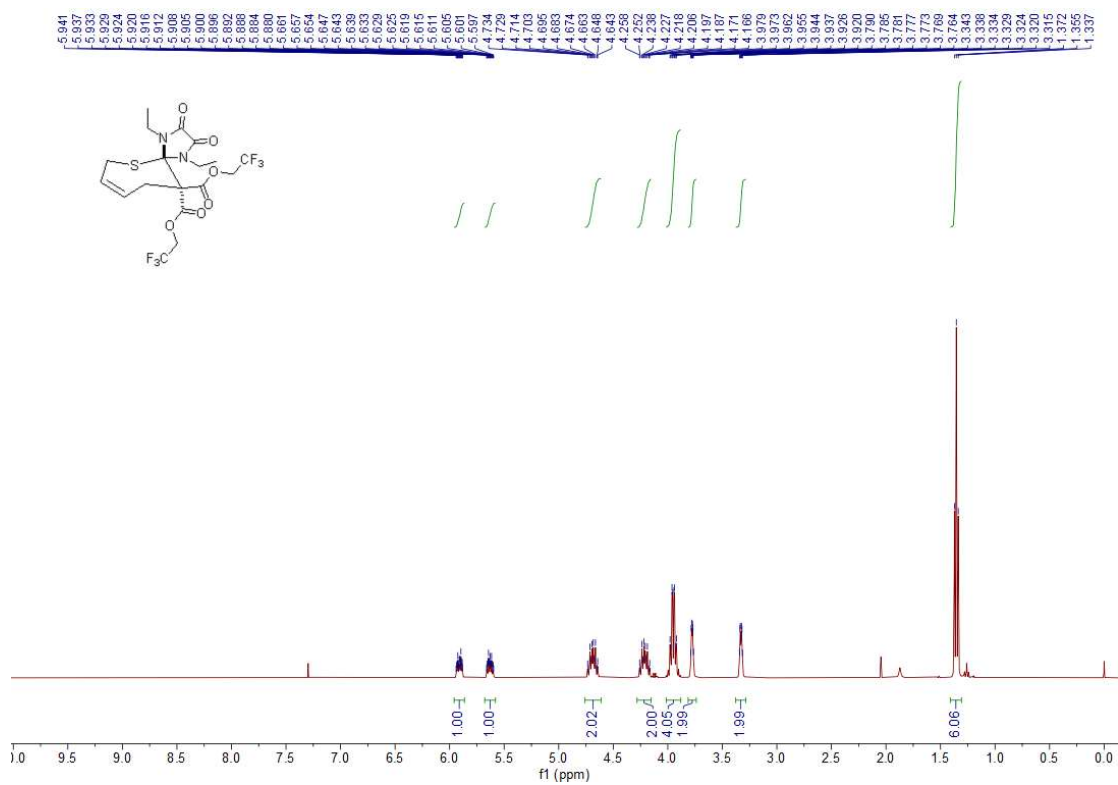

### <sup>13</sup>C NMR Spectrum of 3e

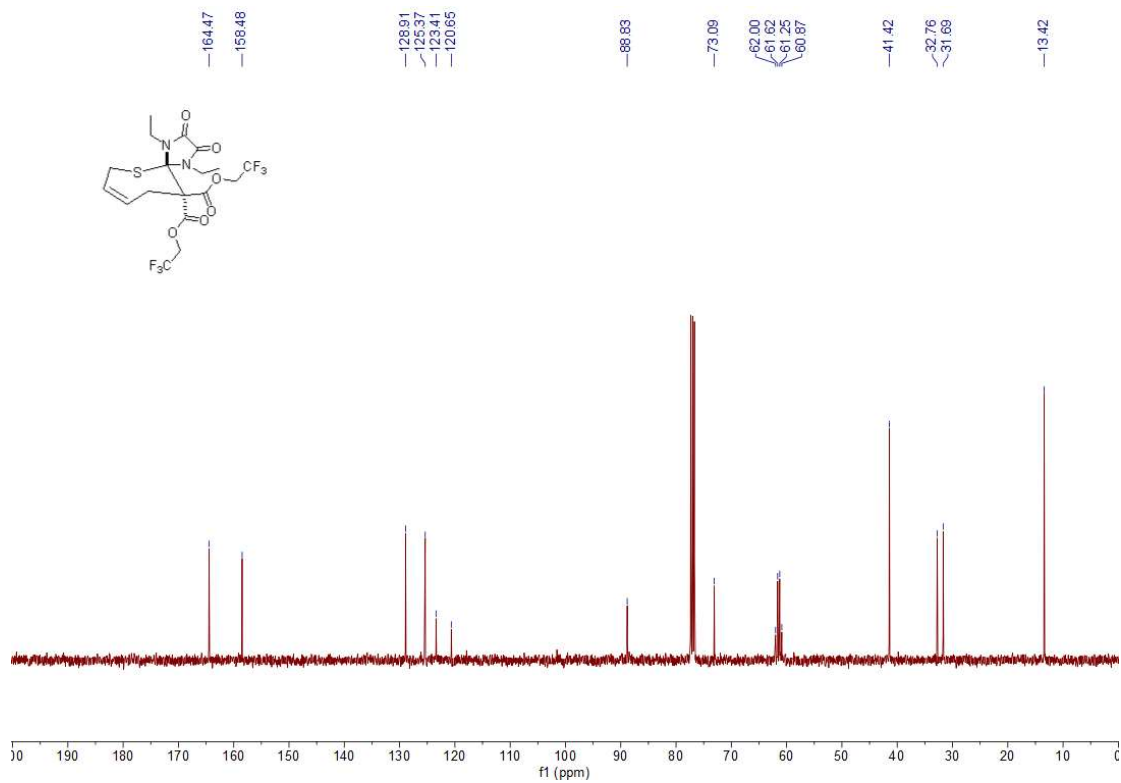

### <sup>1</sup>H NMR Spectrum of **3f**

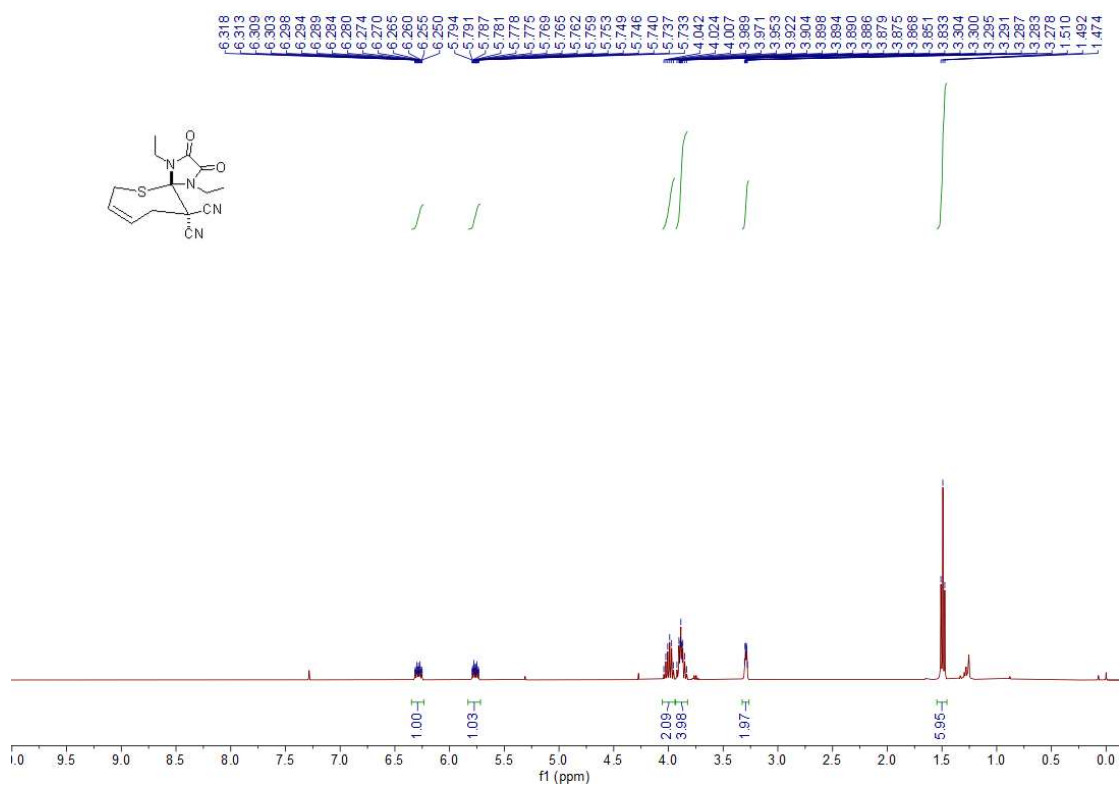

### <sup>13</sup>C NMR Spectrum of **3f**

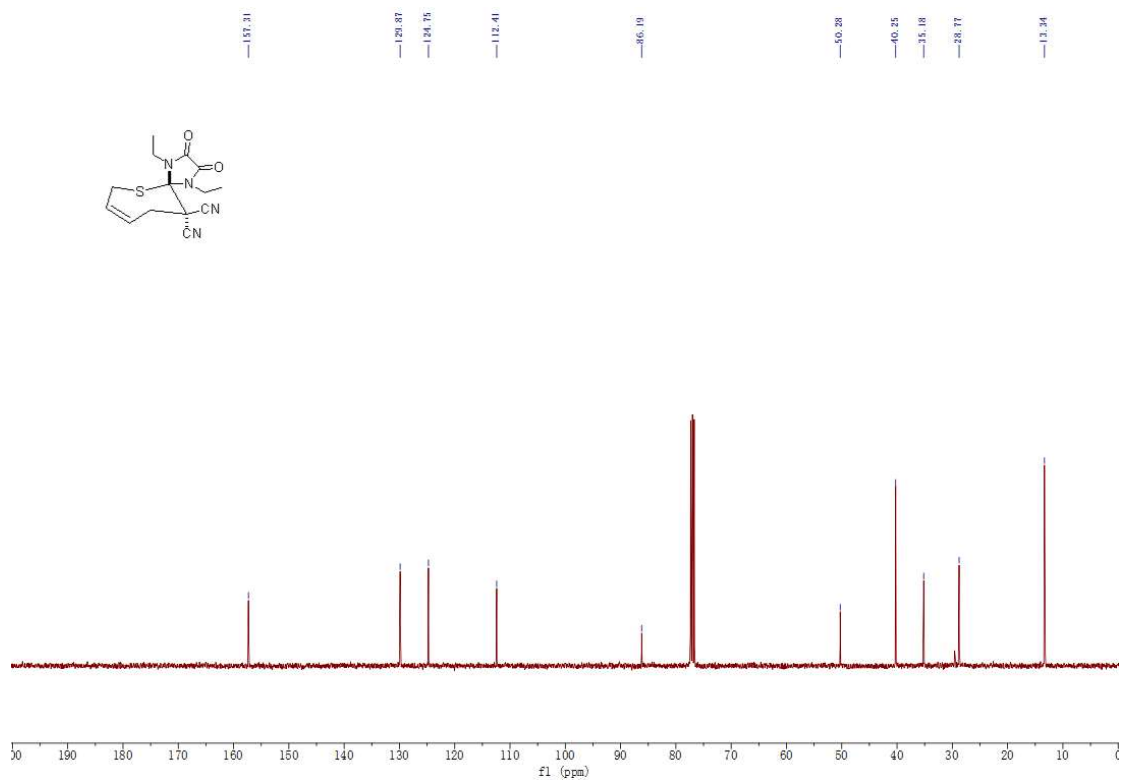

### <sup>1</sup>H NMR Spectrum of **3g**

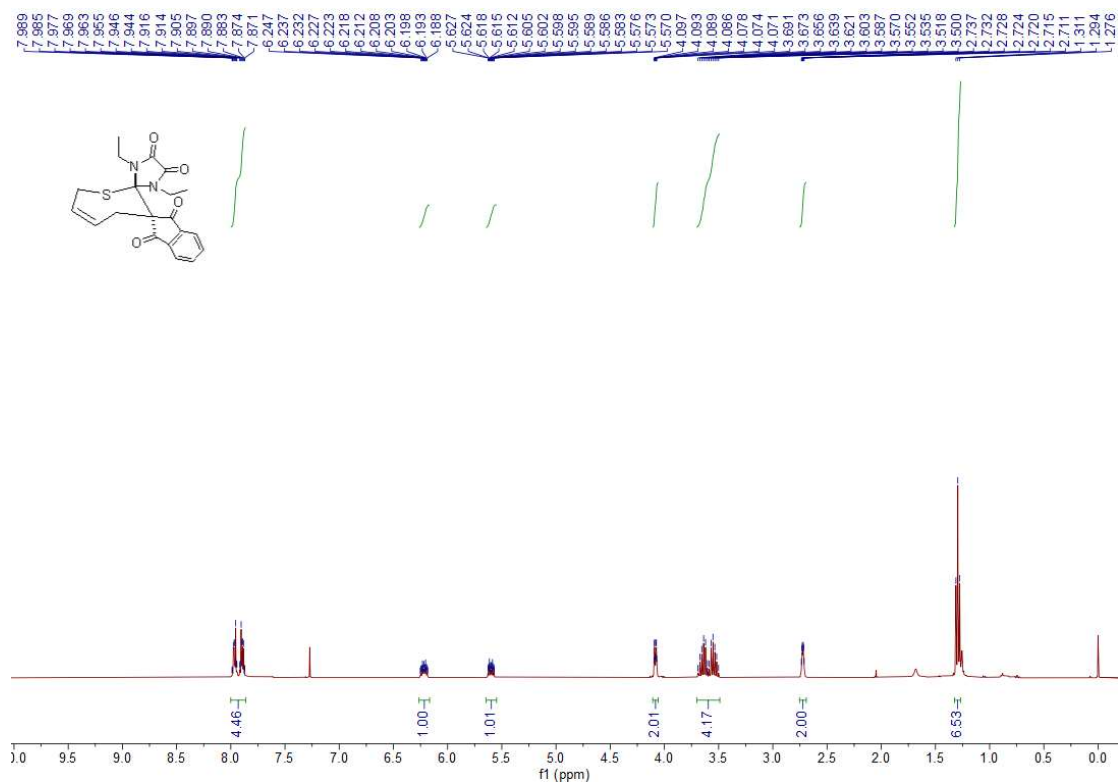

### <sup>13</sup>C NMR Spectrum of **3g**

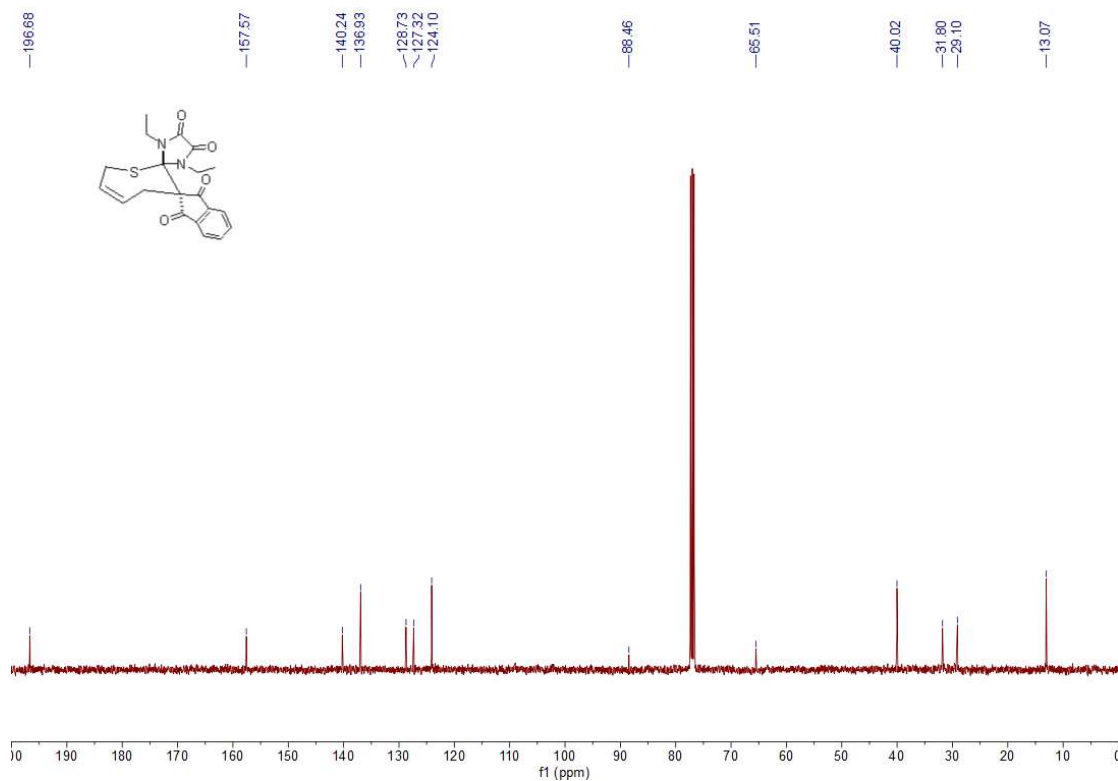

### <sup>1</sup>H NMR Spectrum of **3i**

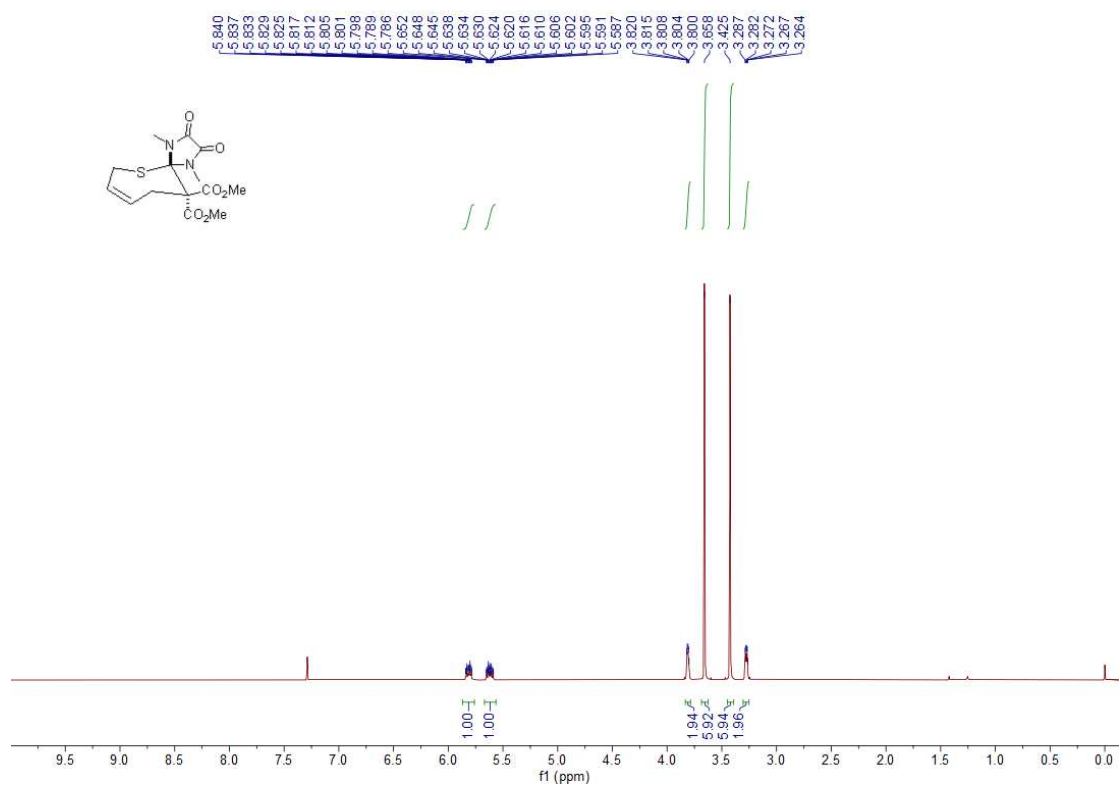

### <sup>13</sup>C NMR Spectrum of **3i**

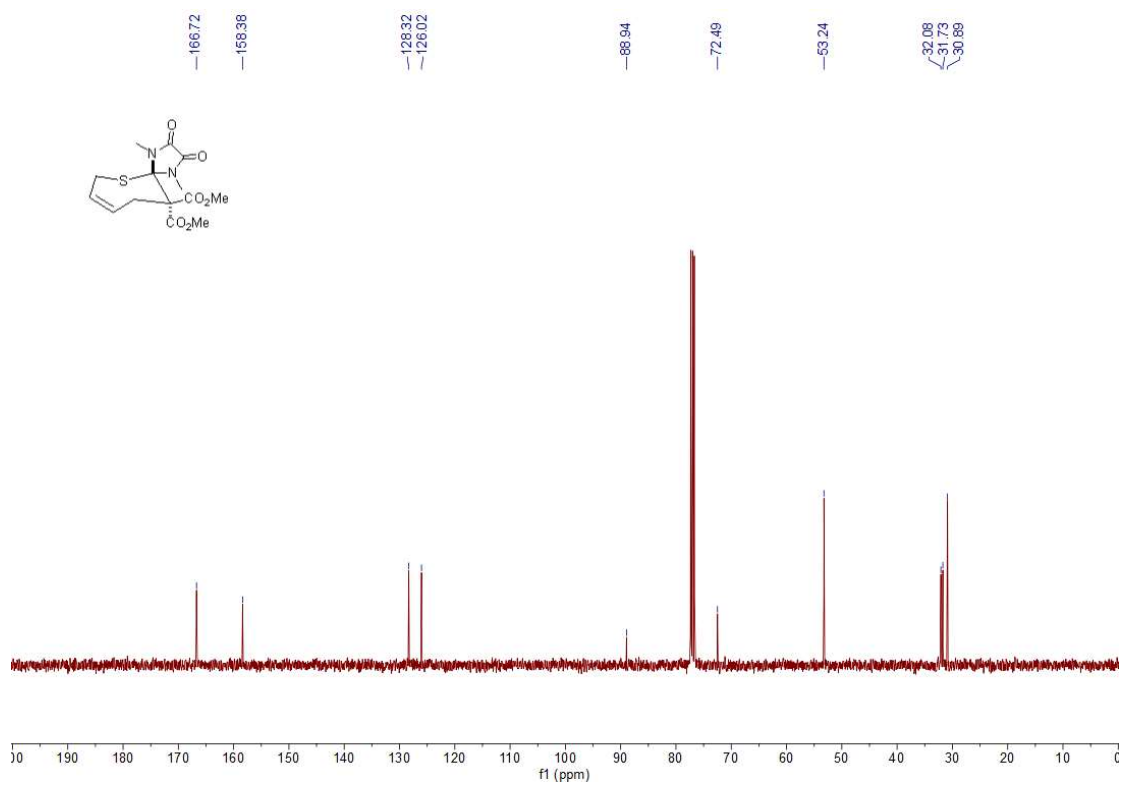

### <sup>1</sup>H NMR Spectrum of **3j**

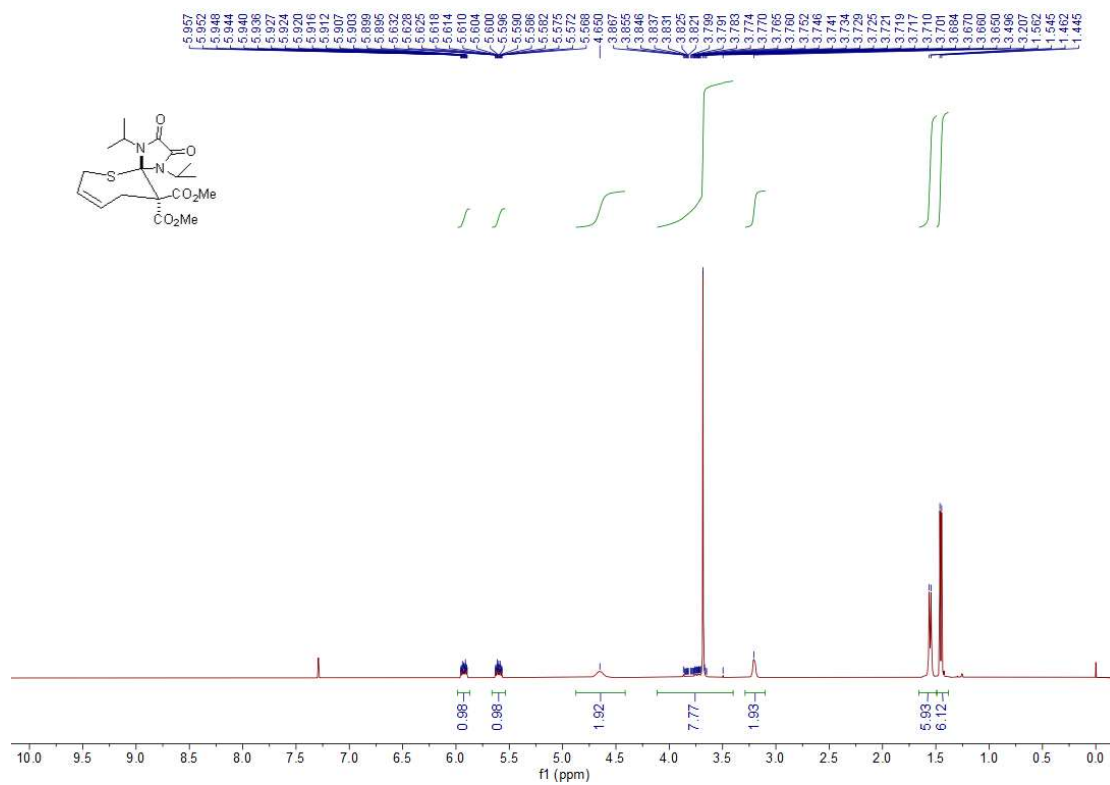

### <sup>13</sup>C NMR Spectrum of **3j**

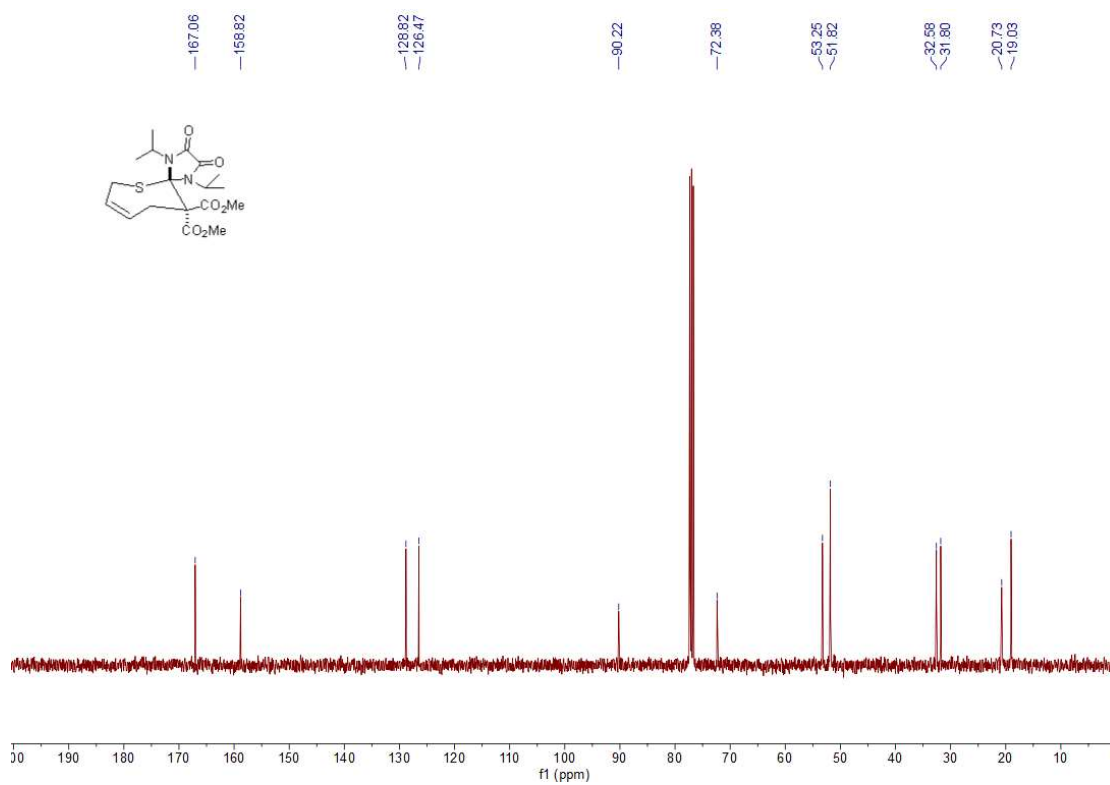

### <sup>1</sup>H NMR Spectrum of 3k

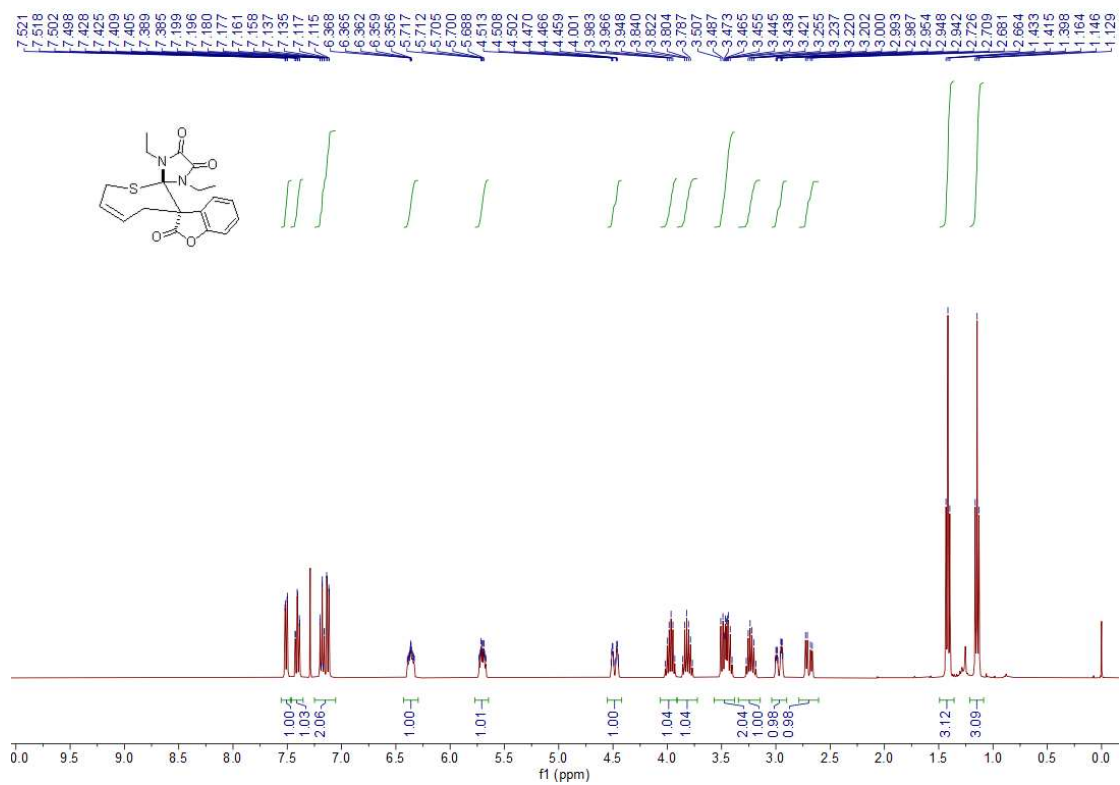

### <sup>13</sup>C NMR Spectrum of 3k

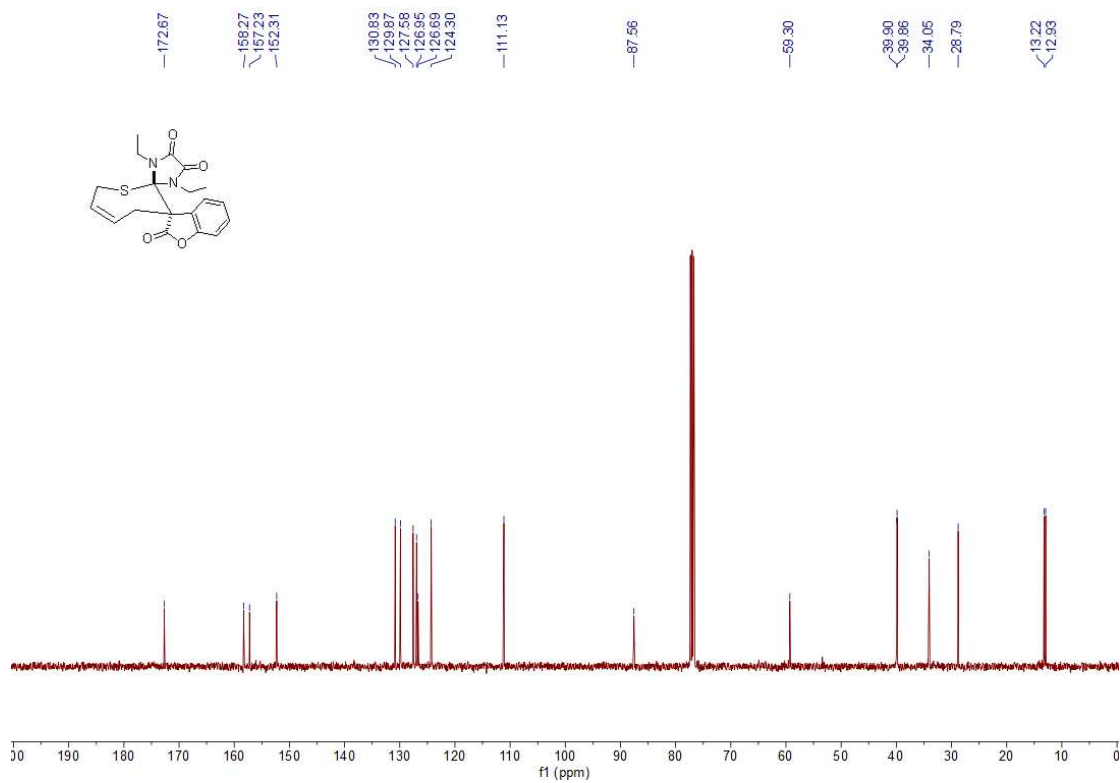

### <sup>1</sup>H NMR Spectrum of **31**

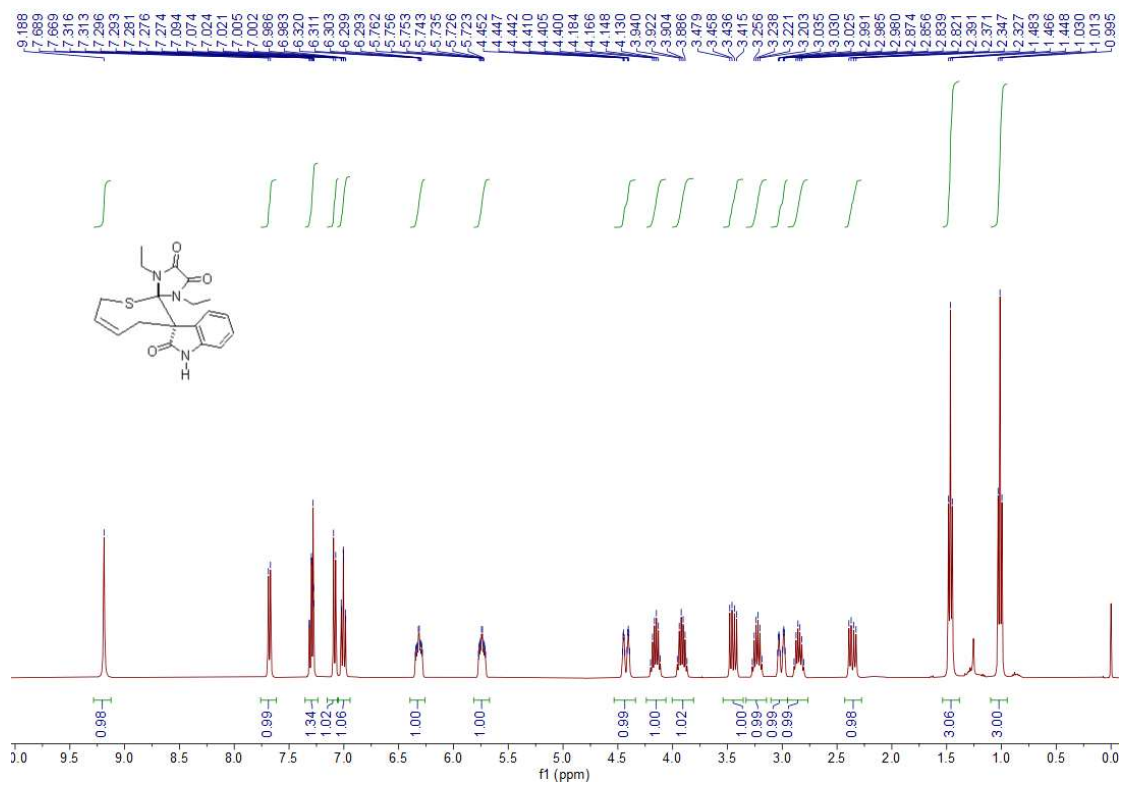

### <sup>13</sup>C NMR Spectrum of **31**

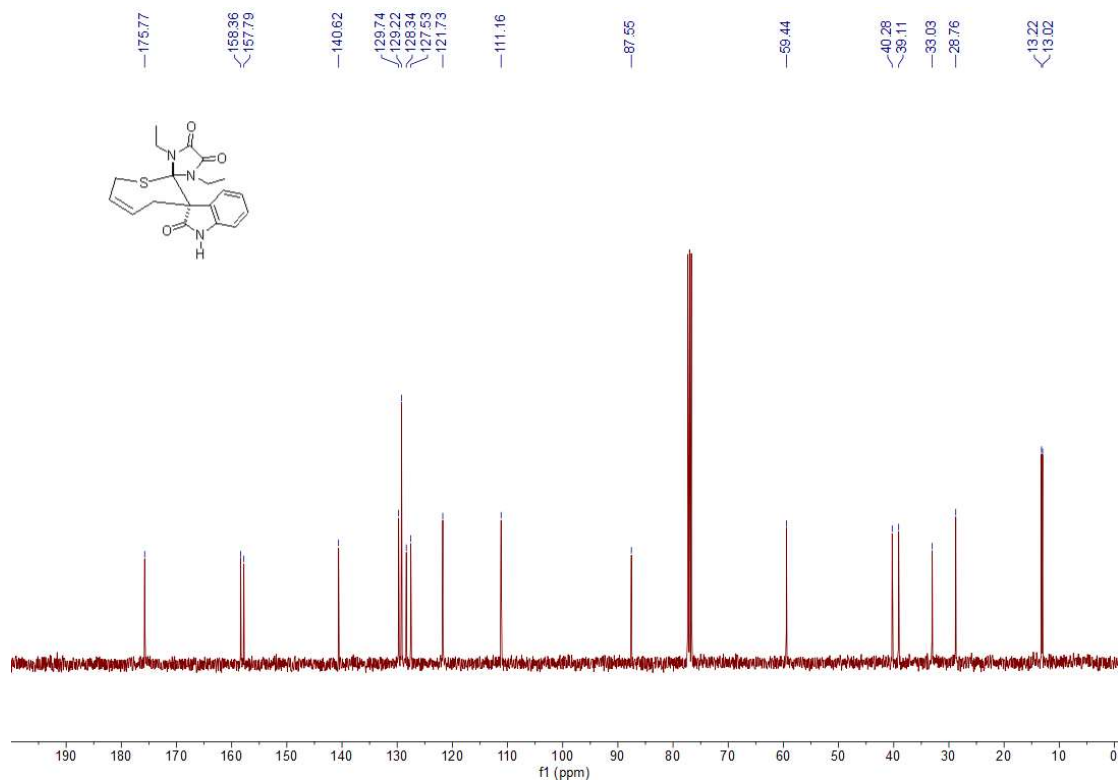



### <sup>1</sup>H NMR Spectrum of 3m

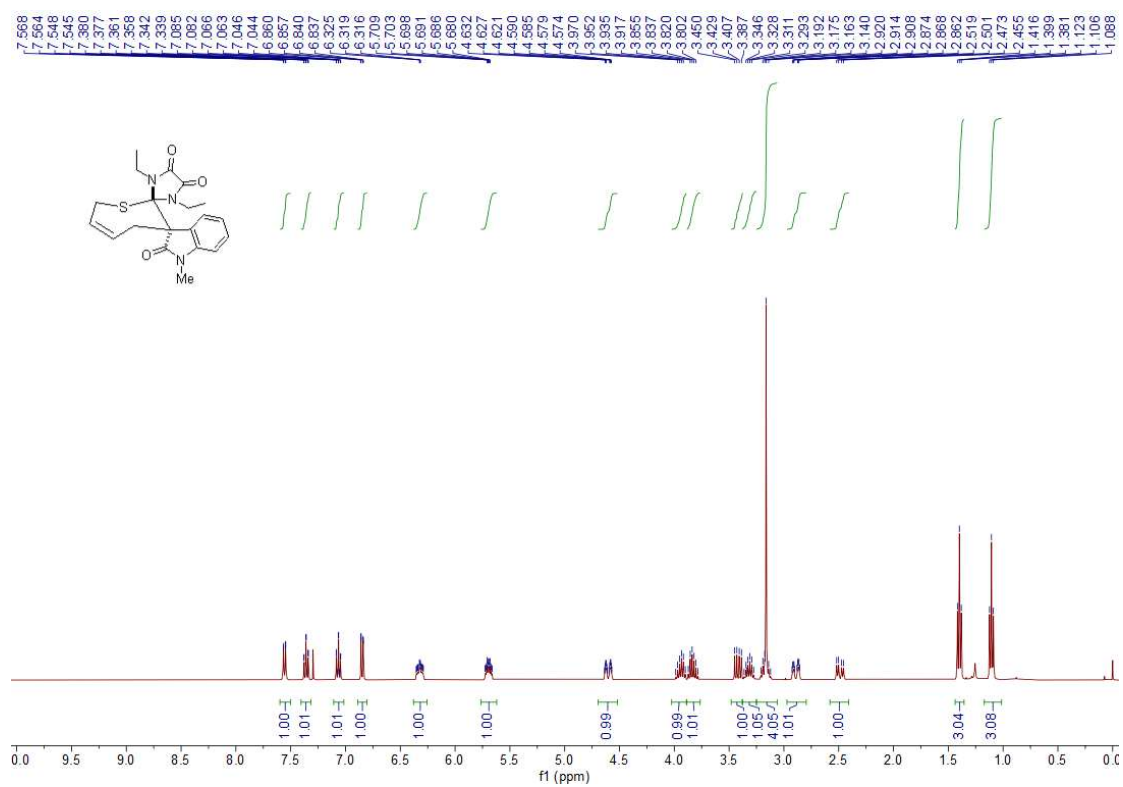

### <sup>13</sup>C NMR Spectrum of 3m

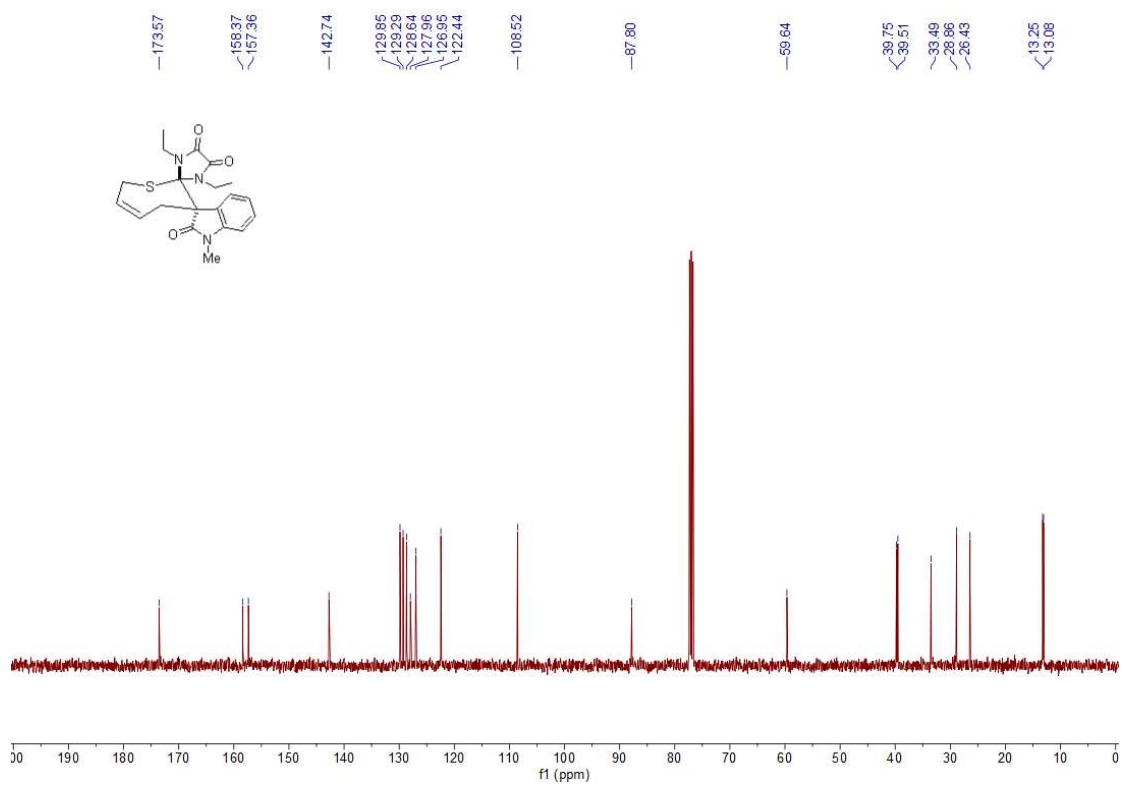

### <sup>1</sup>H NMR Spectrum of 3n

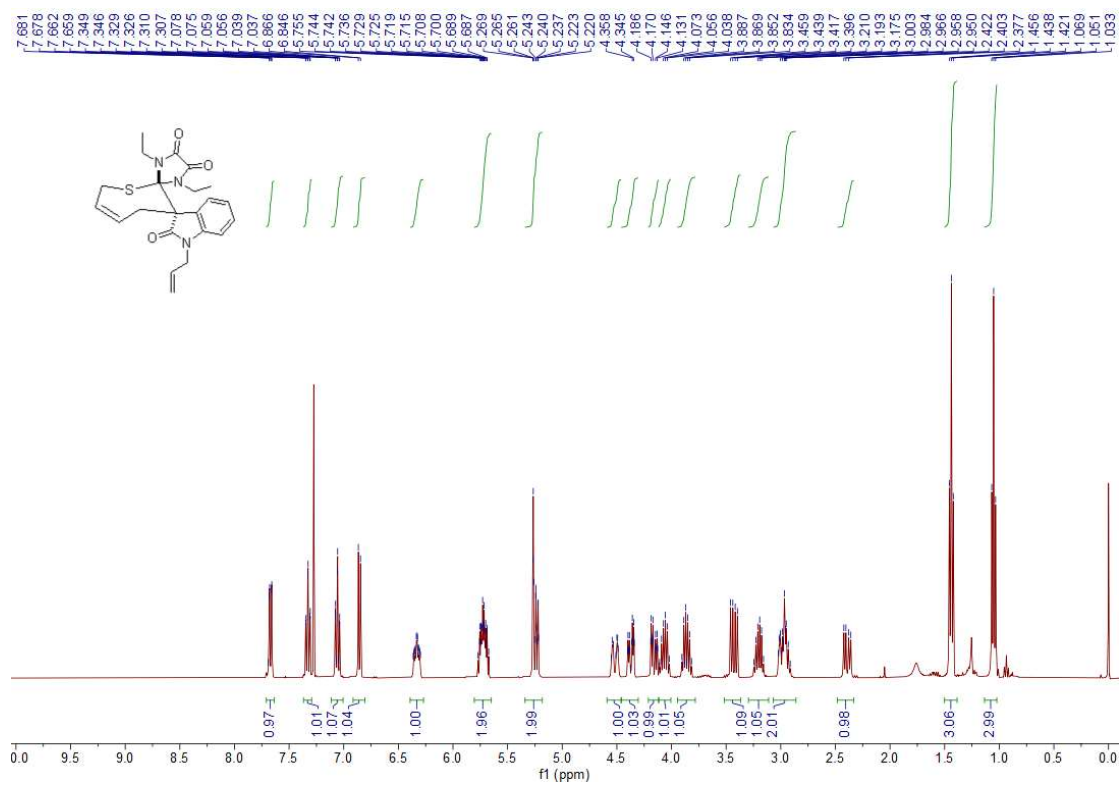

### <sup>13</sup>C NMR Spectrum of 3n

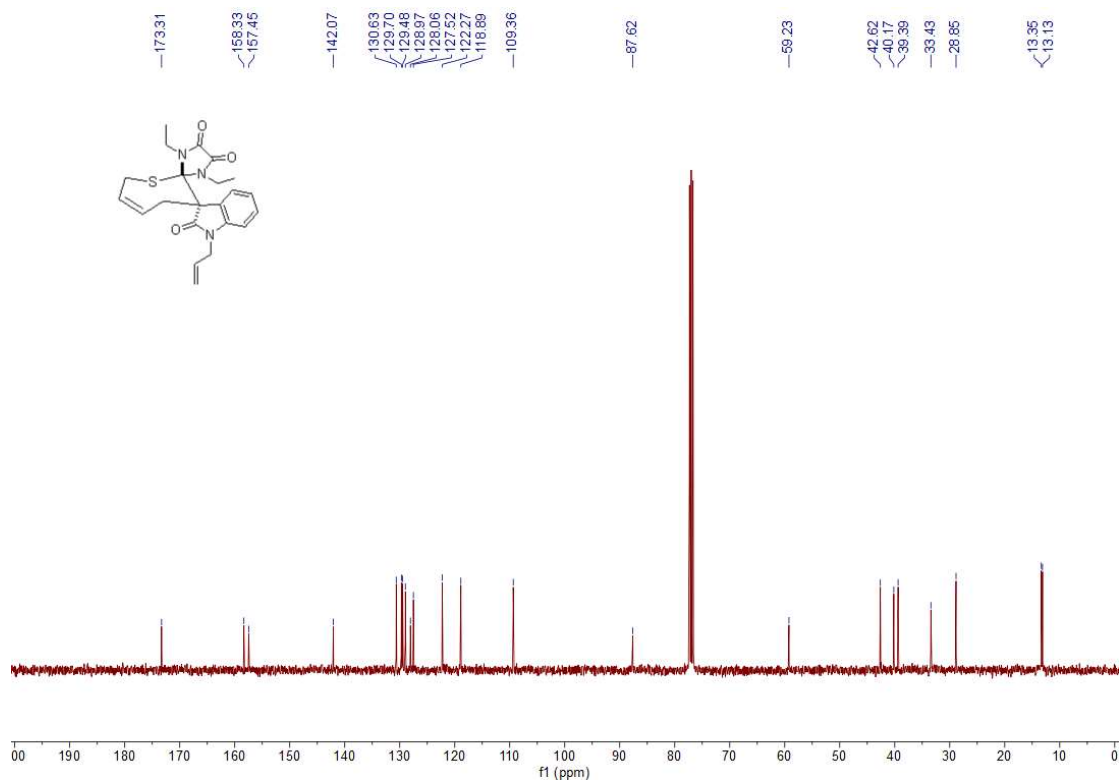

### <sup>1</sup>H NMR Spectrum of **30**

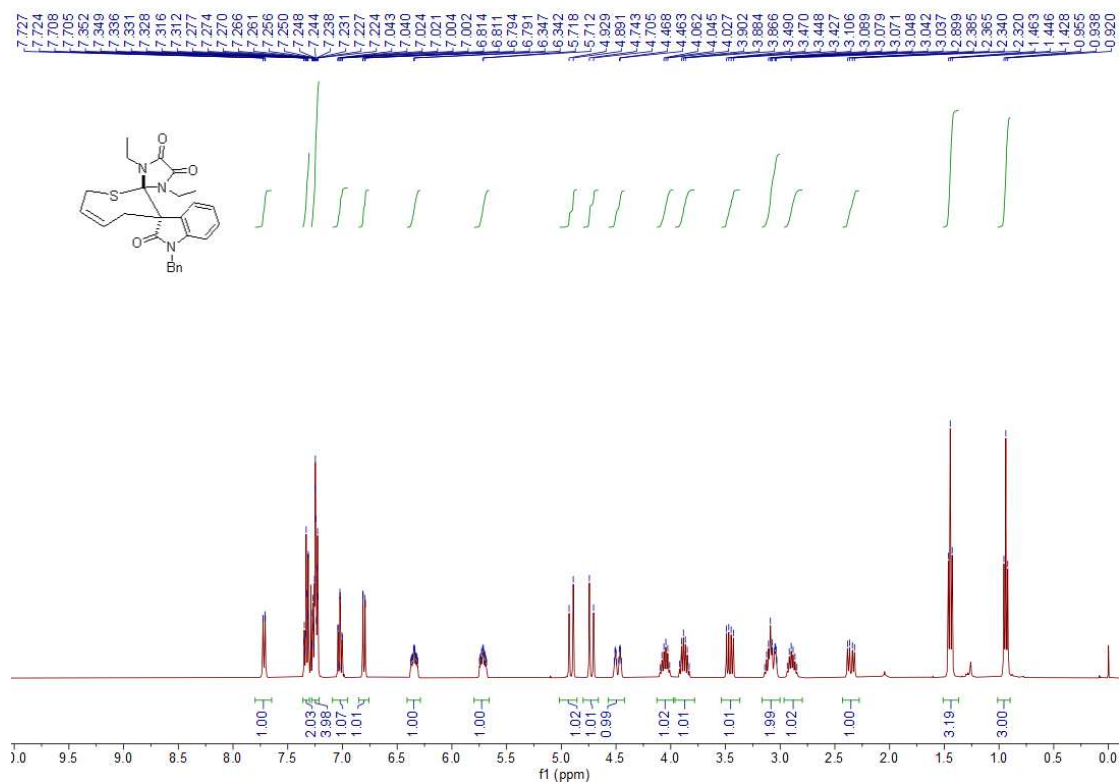

### <sup>13</sup>C NMR Spectrum of **30**

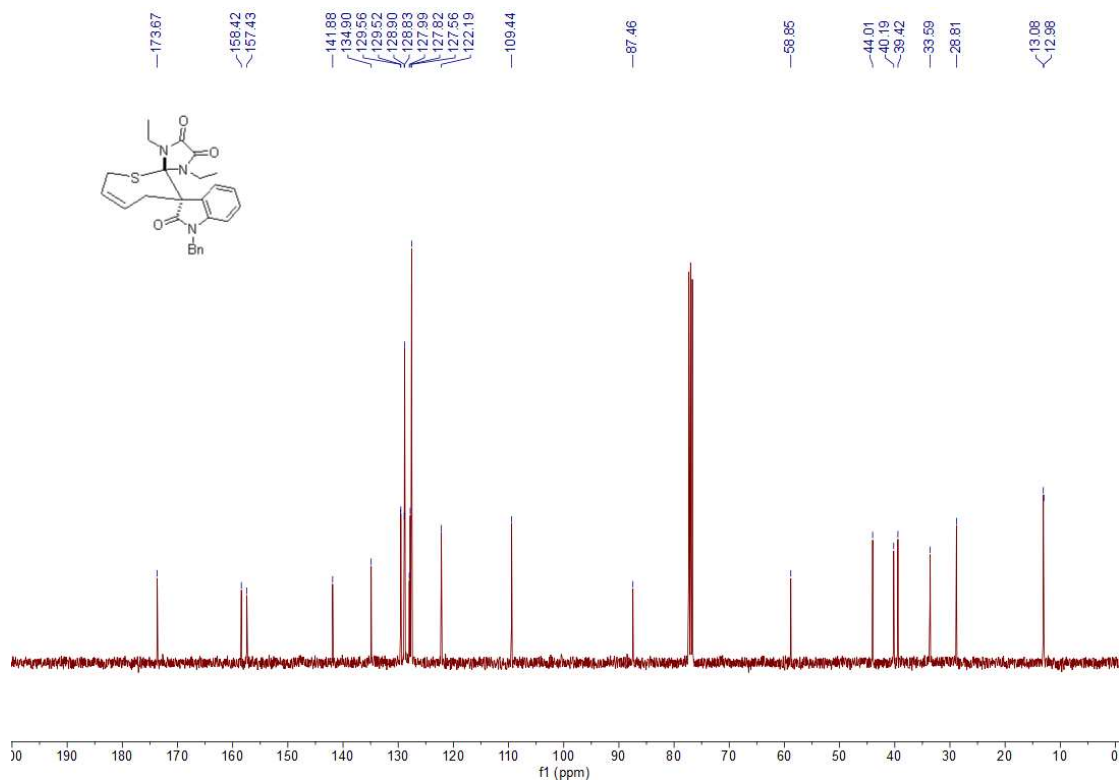

### <sup>1</sup>H NMR Spectrum of 3p

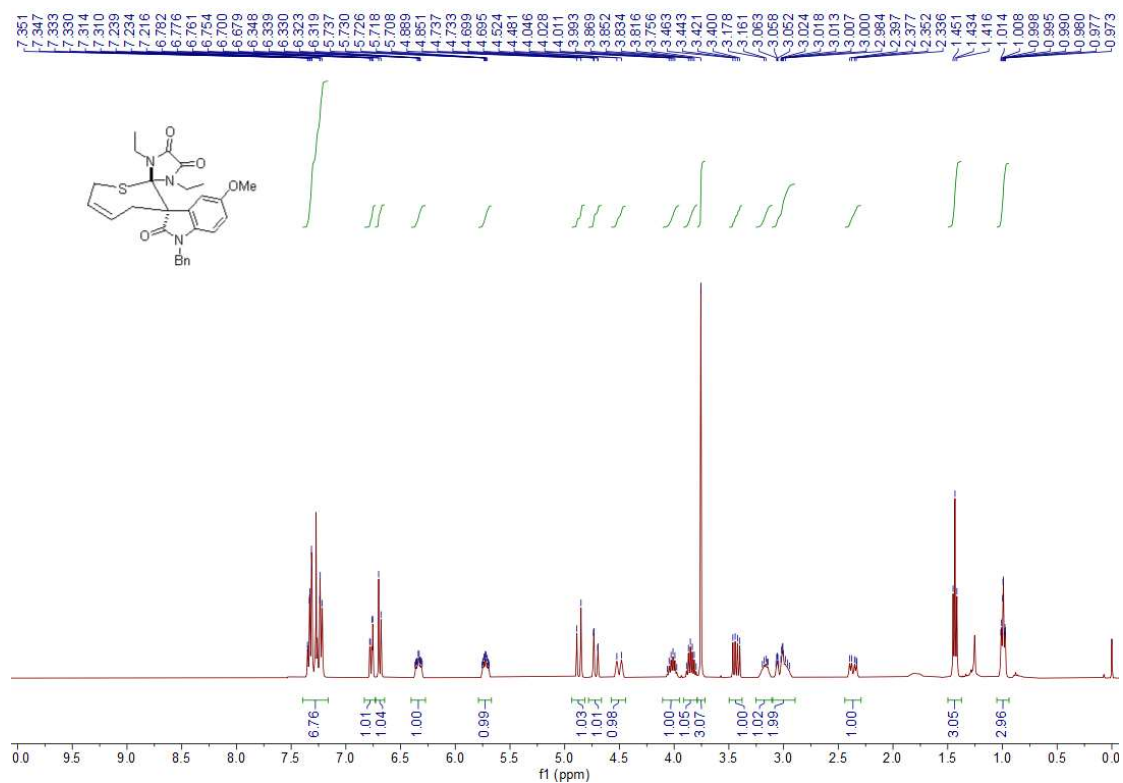

### <sup>13</sup>C NMR Spectrum of 3p

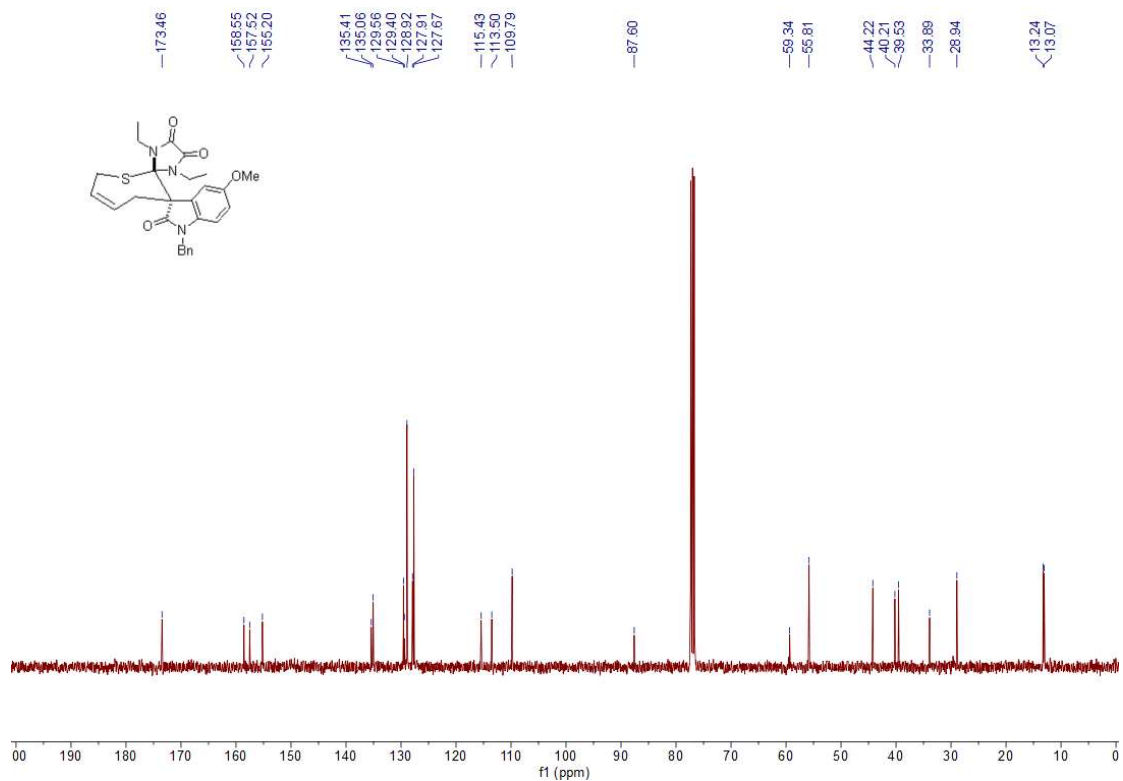

### <sup>1</sup>H NMR Spectrum of **3q**

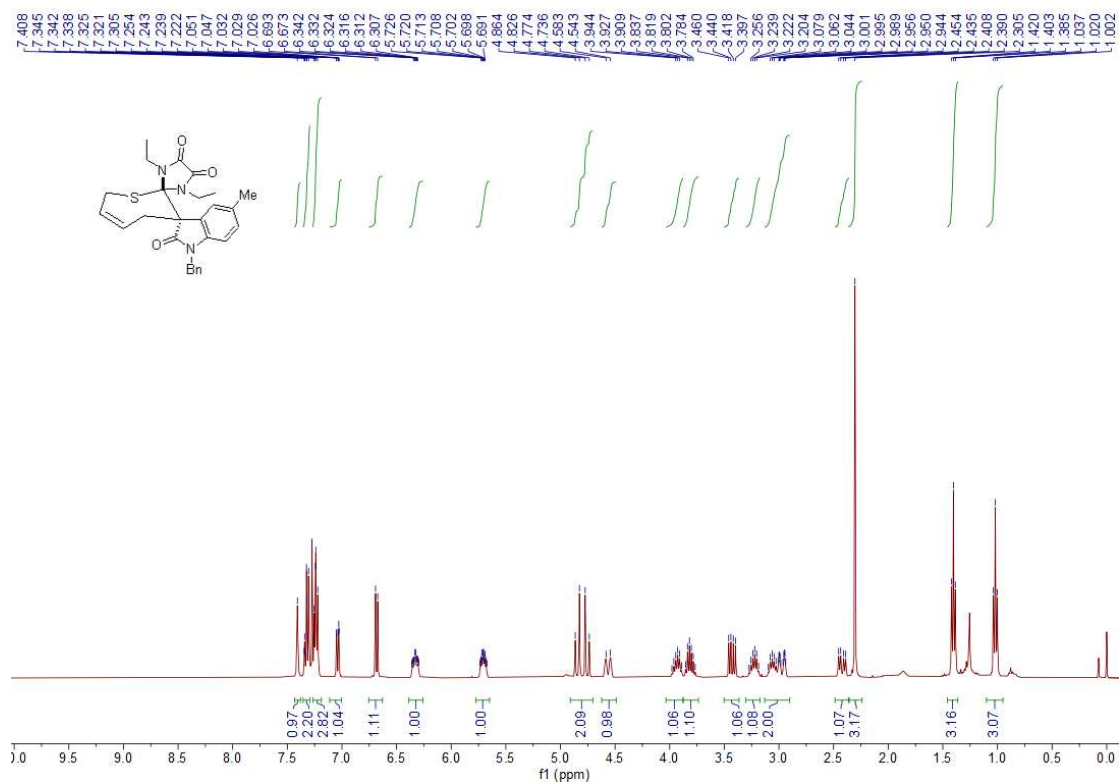

### <sup>13</sup>C NMR Spectrum of **3q**

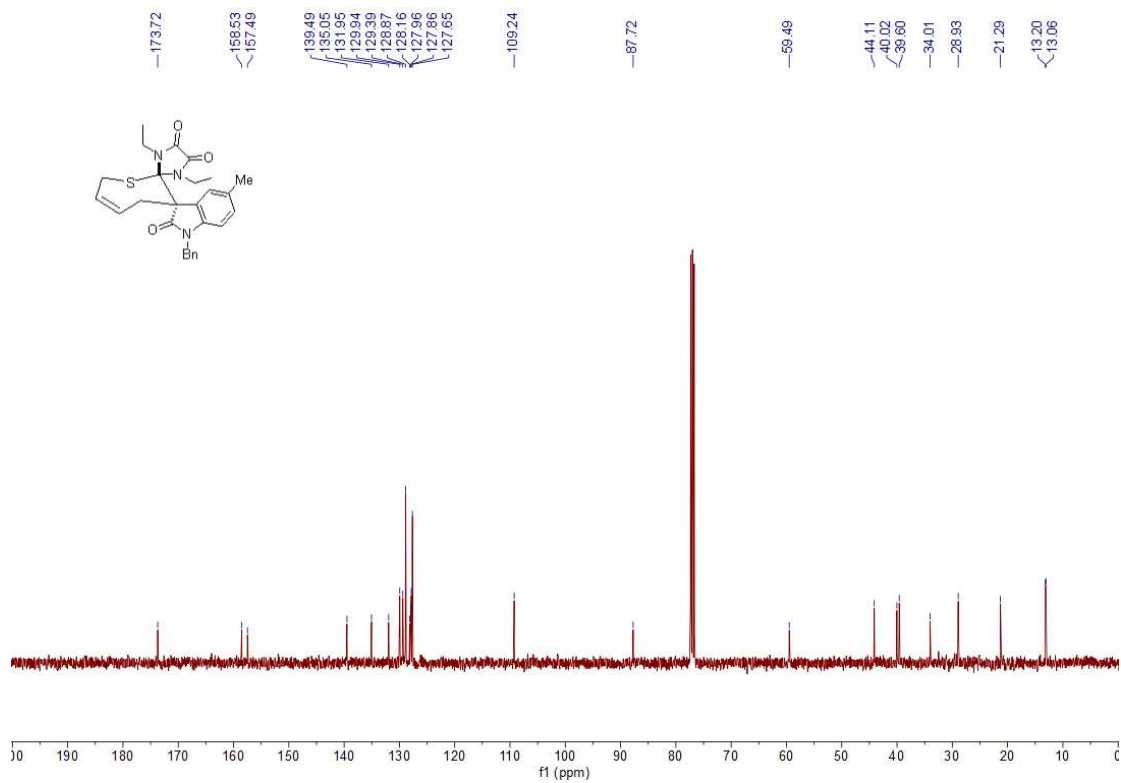

### <sup>1</sup>H NMR Spectrum of 3r

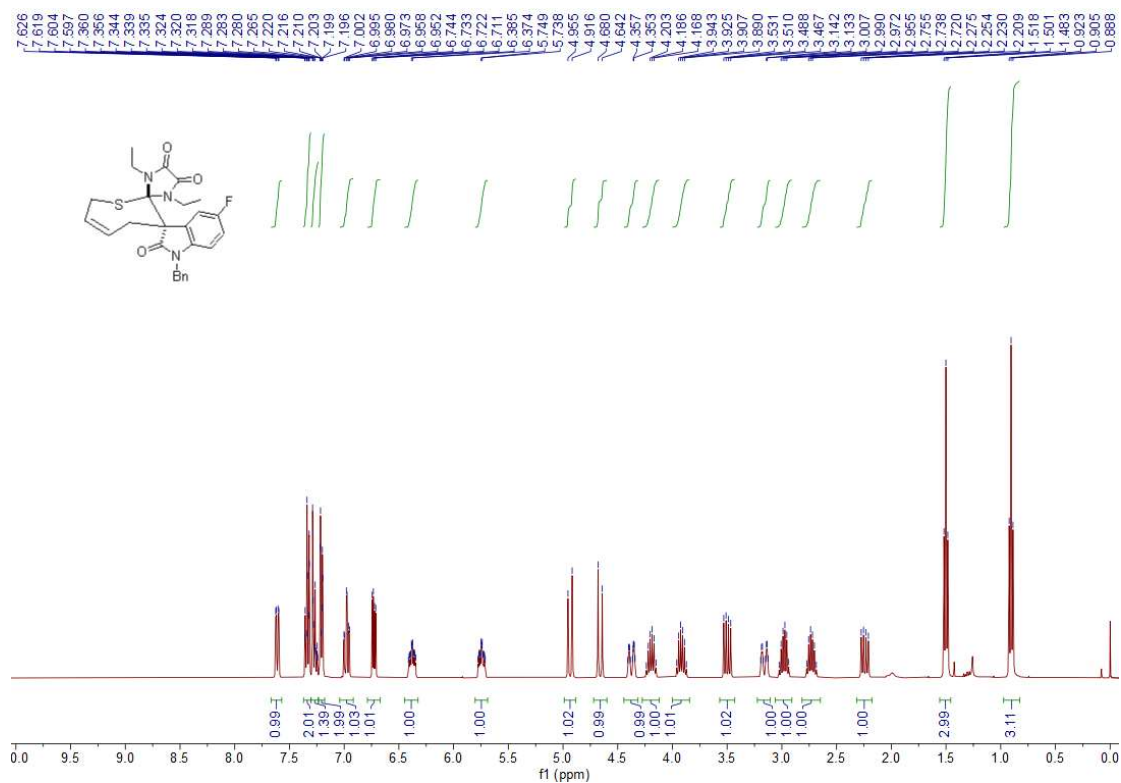

### <sup>13</sup>C NMR Spectrum of 3r

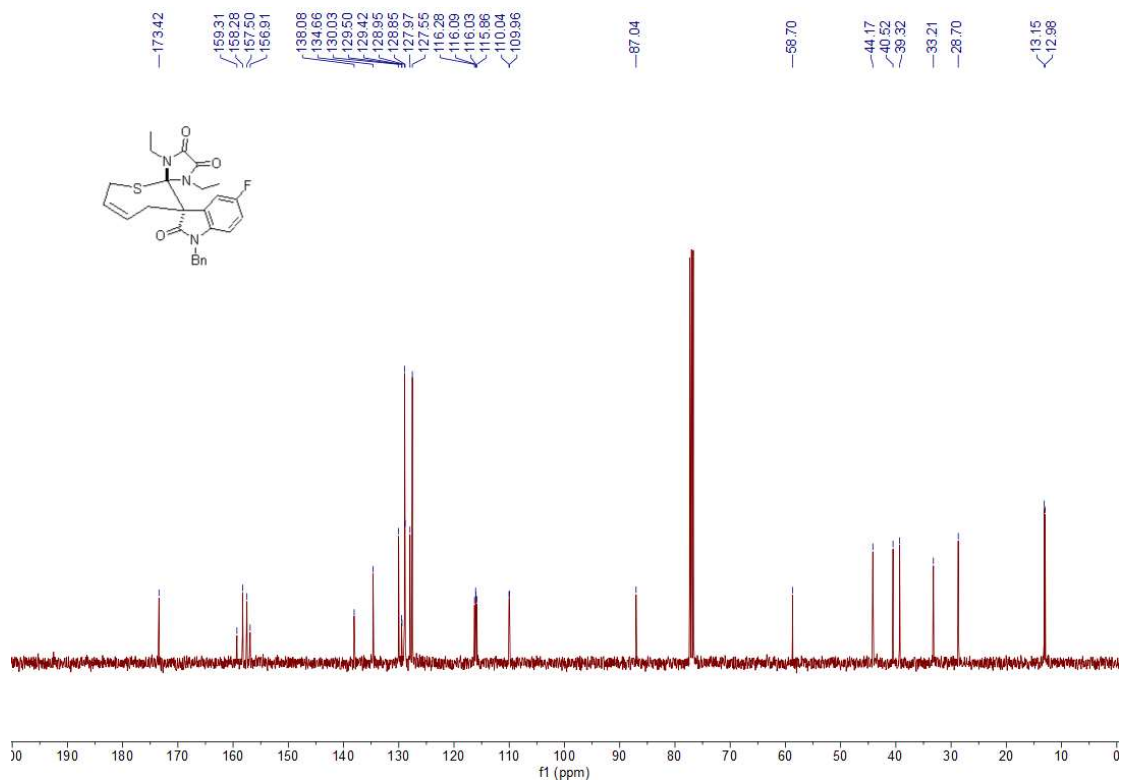

### $^1\text{H}$ NMR Spectrum of 3s

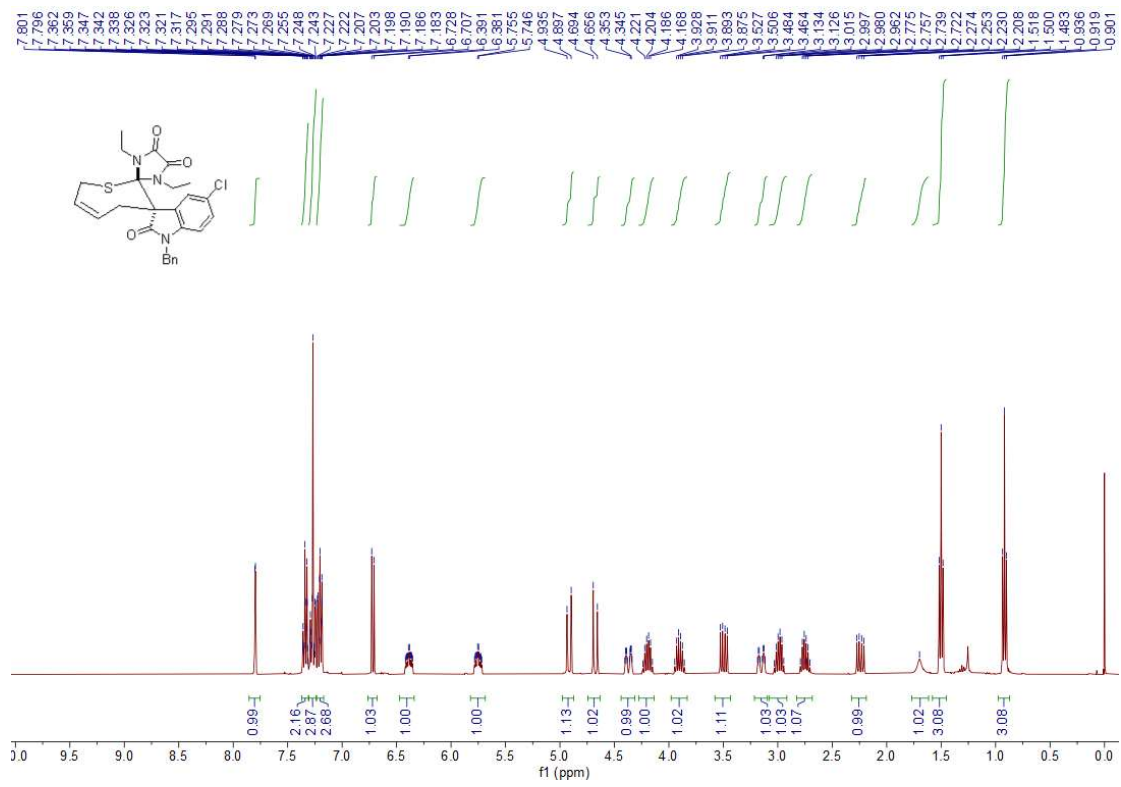

### $^{13}\text{C}$ NMR Spectrum of 3s

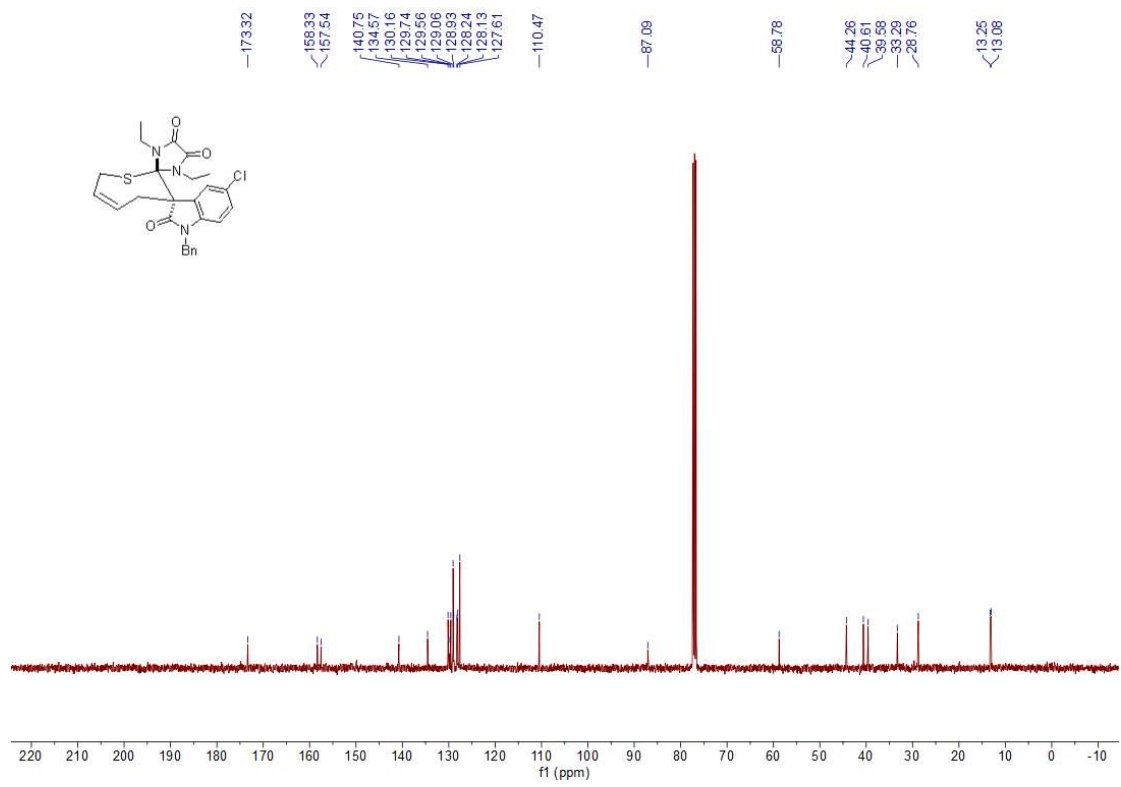

### <sup>1</sup>H NMR Spectrum of 3t

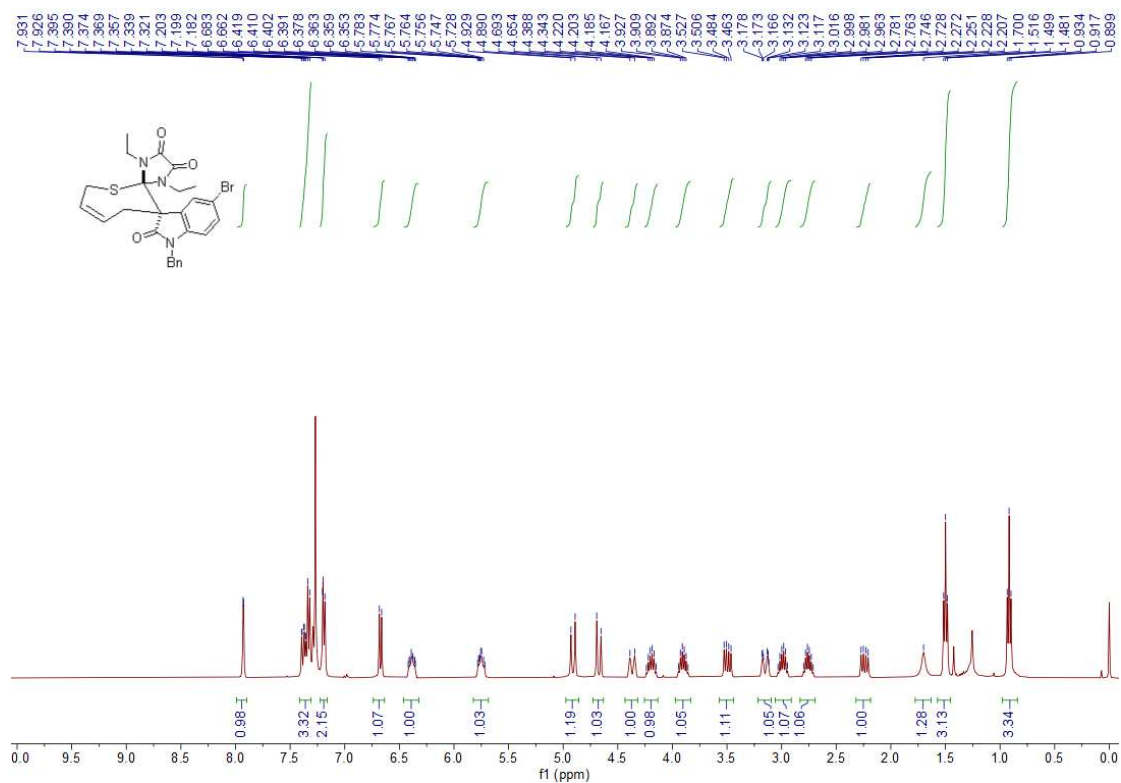

### <sup>13</sup>C NMR Spectrum of 3t

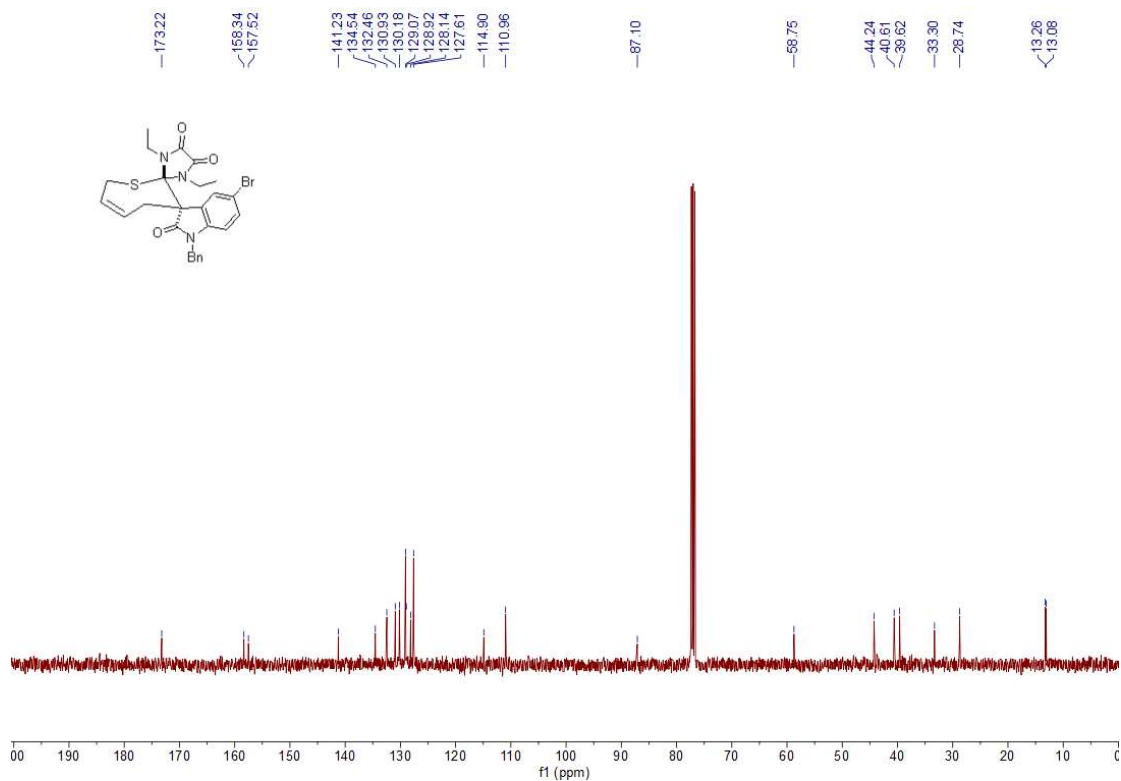



### <sup>1</sup>H NMR Spectrum of **3u**

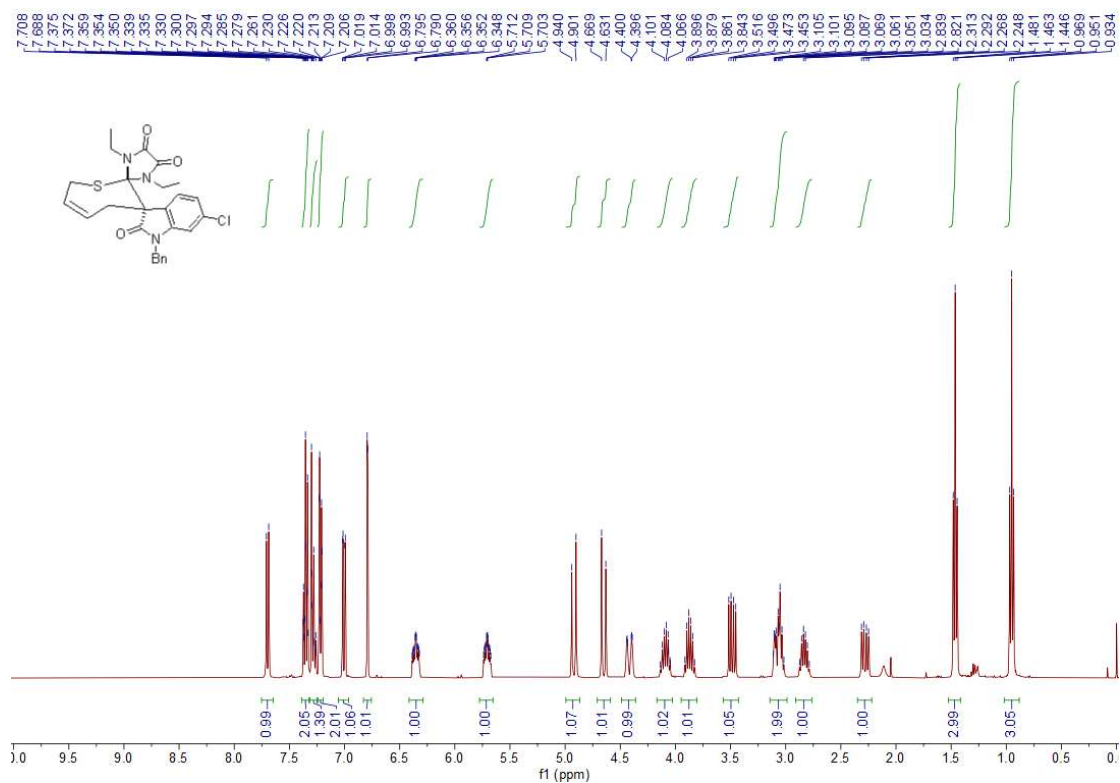

### <sup>13</sup>C NMR Spectrum of **3u**

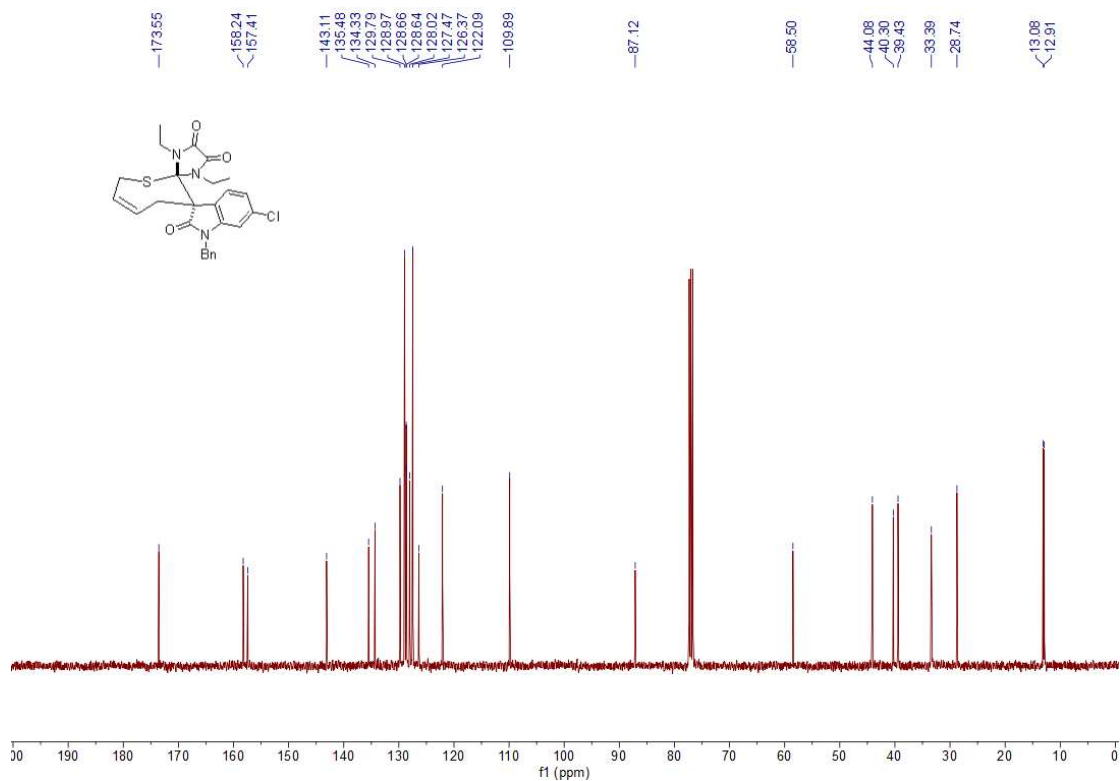

### <sup>1</sup>H NMR Spectrum of **3v**

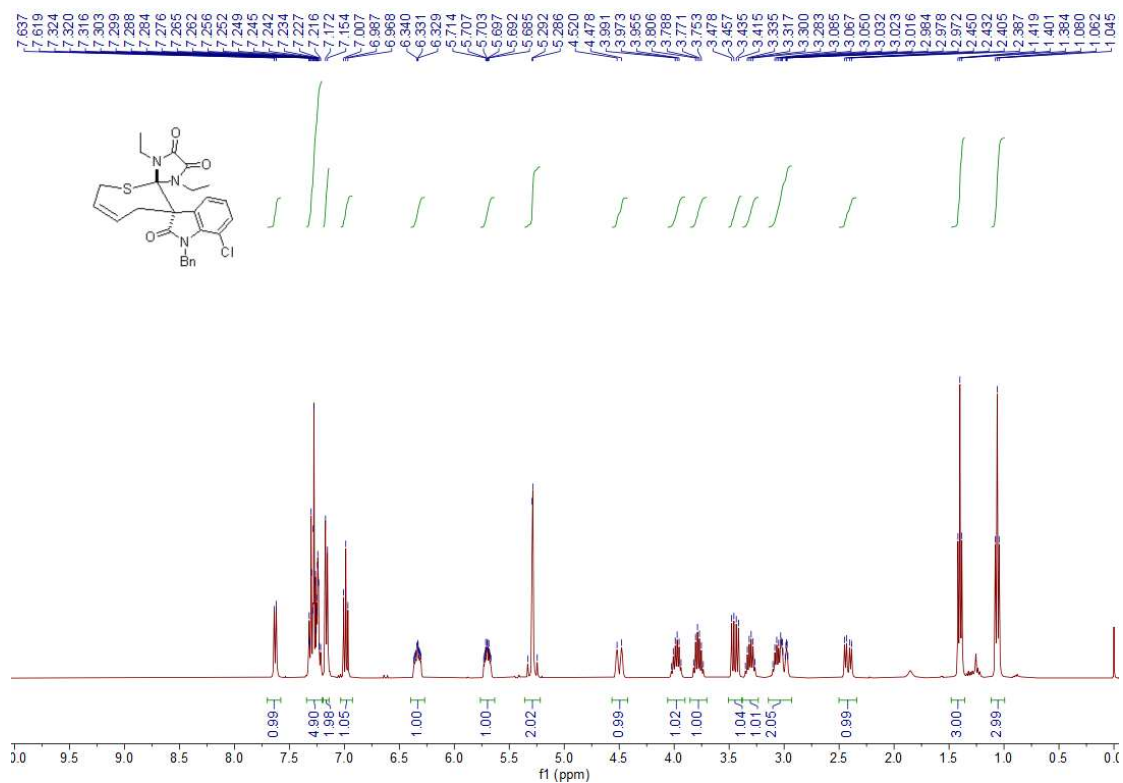

### <sup>13</sup>C NMR Spectrum of **3v**

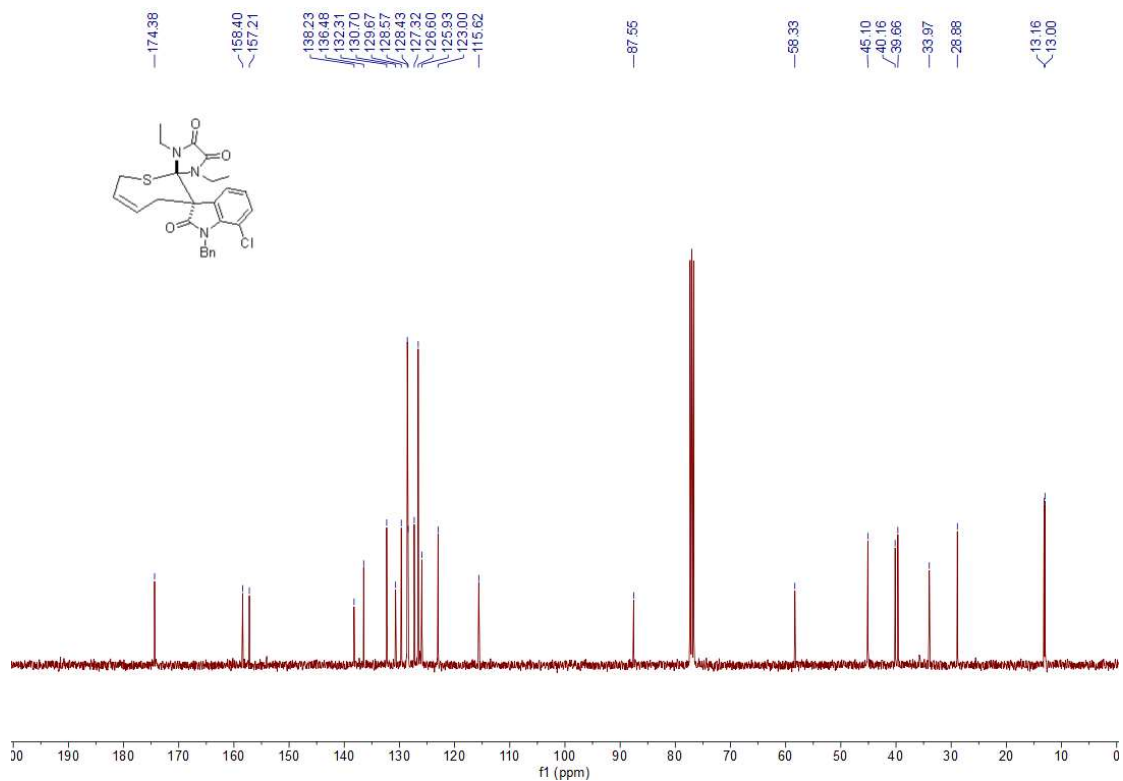

Supplement: d1qo01007g1.pdf [file d1qo01007g1.pdf]
